# Supplementary material for: Theophylline as the catalyst for the diastereoselective synthesis of trans-1,2-dihydrobenzo[a]furo[2,3-c]phenazines in water
Source: Royal Society of Chemistry journal article supplement (doi:10.1039/c6ra18750a), 2016-01-01
Supplement: c6ra18750a1.pdf [file c6ra18750a1.pdf]

## Theophylline as the catalyst for the diastereoselective synthesis of *trans*-1,2-dihydrobenzo[*a*]furo[2,3-*c*]phenazines in water

Afshin Yazdani-Elah-Abadi,<sup>a</sup> Razieh Mohebat<sup>b,\*</sup> and Malek-Taher Maghsoodlou<sup>c</sup>

<sup>a</sup> *Young Researchers and Elite Club, Yazd Branch, Islamic Azad University, Yazd, Iran*

<sup>b</sup> *Department of Chemistry, Yazd Branch, Islamic Azad University, Yazd, Iran*

<sup>c</sup> *Department of Chemistry, Faculty of Science, University of Sistan and Baluchestan, P. O. Box: 98135-674, Zahedan, Iran*

Corresponding author: E-mail: [mohebat@iauyazd.ac.ir](mailto:mohebat@iauyazd.ac.ir)

### Table of contents

|                                                                                  |            |
|----------------------------------------------------------------------------------|------------|
| Experimental procedure.....                                                      | Page 2     |
| Spectral data.....                                                               | Page 3-9   |
| Copies of <sup>1</sup> H, <sup>13</sup> C NMR and Mass spectra of compounds..... | Page 10-68 |

## Experimental

### General

All melting points were determined on an Electrothermal 9100 apparatus and are uncorrected. IR spectra were recorded on a Shimadzu IR-470 spectrometer. Elemental analyses for C, H, and N were performed using a Costech ECS 4010 CHNS-O analyser at the analytical laboratory of Islamic Azad University Yazd branch. Mass spectra were recorded on an Agilent Technology (HP) spectrometer operating at an ionization potential of 70 eV. The  $^1\text{H}$  nuclear magnetic resonance (NMR) and  $^{13}\text{C}$  NMR spectra were recorded in  $\text{CDCl}_3$  on a Bruker DRX-300 spectrometer operating at 300 MHz for  $^1\text{H}$  analysis and 75 MHz for  $^{13}\text{C}$  analysis. Thin-layer chromatography (TLC) was performed on silica-gel Polygram SILG/UV 254 plates. All reagents and solvent were purchased from Merck and Aldrich and used without further purification.

### General procedure for the synthesis of novel 1,2-dihydrobenzo[*a*]furo[2,3-*c*]phenazine derivatives (6a-p)

Initially, a mixture of 2-hydroxynaphthalene-1,4-dione **1** (1 mmol), benzene-1,2-diamine **2** (1 mmol), theophylline (20 mol%) and water (10 mL) was placed in a 50 mL round-bottomed flask mounted over a magnetic stirrer. The contents were stirred magnetically in an oil-bath maintained at 70°C until in less than 10 minutes benzo[*a*]phenazin-5-ol **3** was formed. Then, aryl aldehyde **4** (1 mmol) and 1-(2-(4-bromophenyl)-2-oxoethyl)pyridinium bromide **5** (1 mmol) were added to the above reaction mixture which was heated further at same temperature for an appropriate time as shown in Table 2. Upon completion of the reaction, monitored by TLC, the reaction mixture was allowed to cool to room temperature. Then, 5 mL of water was added to the mixture and filtered for separation of the crude product. The separated product was washed twice with water (2×5 mL). The solid crude product subsequently recrystallized from hot ethanol to give the pure product **6**.

## Spectral data

### **(4-Bromophenyl)(1-(4-chlorophenyl)-1,2-dihydrobenzo[*a*]furo[2,3-*c*]phenazin-2-yl)methanone (6a)**

Yellow powder; yield 0.502 g (89%), mp 279-281 °C; IR (KBr):  $\nu_{\max}$  = 3045, 2900, 1691, 1627, 1591, 1535, 1499, 1415, 1386, 1332, 1224, 1131, 1045, 978, 800, 759  $\text{cm}^{-1}$ ;  $^1\text{H}$  NMR (300 MHz,  $\text{CDCl}_3$ ):  $\delta$  5.46 (d, 1H,  $J$  = 4.2 Hz, CH), 6.10 (d, 1H,  $J$  = 4.2 Hz, CH), 7.22 (d, 2H,  $J$  = 8.4 Hz, Ar-H), 7.32 (d, 2H,  $J$  = 8.4 Hz, Ar-H), 7.59-7.67 (m, 4H, Ar-H), 7.78-7.83 (m, 4H, Ar-H), 7.89-7.92 (m, 1H, Ar-H), 8.15-8.20 (m, 2H, Ar-H), 9.32-9.35 (m, 1H, Ar-H) ppm;  $^{13}\text{C}$  NMR (75 MHz,  $\text{CDCl}_3$ ):  $\delta$  50.1 and 91.9 (2CH), 115.4, 122.6, 123.9, 126.1, 128.6, 128.8, 128.9, 129.0, 129.2, 129.5, 129.7, 129.9, 130.0, 130.6, 132.3, 132.5, 133.2, 140.2, 140.4, 141.3, 141.5, 142.5 and 157.9 ( $\text{C}_{\text{olefinic}}$  and  $\text{C}_{\text{arom}}$ ), 192.7 (C=O) ppm; MS ( $m/z$ , %): 565 ( $\text{M}^+$ , 1), 448 (1), 381 (100), 246 (91), 185 (15), 43 (76); Anal. Calcd for  $\text{C}_{31}\text{H}_{18}\text{BrClN}_2\text{O}_2$ : C, 65.80; H, 3.21; N, 4.95 %. Found: C, 66.03; H, 3.46; N, 4.87 %.

### **(4-Bromophenyl)(1-(2-chlorophenyl)-1,2-dihydrobenzo[*a*]furo[2,3-*c*]phenazin-2-yl)methanone (6b)**

Orange powder; yield 0.492 g (87%), mp 243-245 °C; IR (KBr):  $\nu_{\max}$  = 3035, 2895, 1692, 1626, 1594, 1534, 1498, 1414, 1386, 1332, 1223, 1129, 1045, 978, 800, 759  $\text{cm}^{-1}$ ;  $^1\text{H}$  NMR (300 MHz,  $\text{CDCl}_3$ ):  $\delta$  6.11 (s, 2H, 2CH), 6.99-7.14 (m, 3H, Ar-H), 7.39 (d, 1H,  $J$  = 7.8 Hz, Ar-H), 7.60 (d, 2H,  $J$  = 8.7 Hz, Ar-H), 7.64-7.67 (m, 2H, Ar-H), 7.73-7.82 (m, 2H, Ar-H), 7.88 (d, 2H,  $J$  = 8.4 Hz, Ar-H), 7.93-7.96 (m, 1H, Ar-H), 8.08-8.11 (m, 1H, Ar-H), 8.17-8.21 (m, 1H, Ar-H), 9.33-9.36 (m, 1H, Ar-H) ppm;  $^{13}\text{C}$  NMR (75 MHz,  $\text{CDCl}_3$ ):  $\delta$  46.6 and 90.9 (2CH), 115.3, 122.5, 124.0, 125.7, 126.1, 127.3, 128.5, 128.6, 128.8, 129.1, 129.3, 129.6, 129.7, 129.8, 129.9, 130.8, 131.4, 131.9, 132.2, 132.5, 132.9, 133.5, 139.3, 140.3, 141.2, 141.7, 142.7 and 158.1 ( $\text{C}_{\text{olefinic}}$  and  $\text{C}_{\text{arom}}$ ), 191.9 (C=O) ppm; MS ( $m/z$ , %): 565 ( $\text{M}^+$ , 1), 529 (1), 381 (100), 246 (9), 183 (11), 76 (4); Anal. Calcd for  $\text{C}_{31}\text{H}_{18}\text{BrClN}_2\text{O}_2$ : C, 65.80; H, 3.21; N, 4.95 %. Found: C, 65.93; H, 3.51; N, 5.10 %.

### **(4-Bromophenyl)(1-(2,4-dichlorophenyl)-1,2-dihydrobenzo[*a*]furo[2,3-*c*]phenazin-2-yl)methanone (6c)**

Yellow powder; yield 0.534 g (89%), mp 256-257 °C; IR (KBr):  $\nu_{\max}$  = 3110, 2905, 1683, 1626, 1591, 1534, 1500, 1412, 1380, 1351, 1221, 1134, 1065, 978, 800, 761  $\text{cm}^{-1}$ ;  $^1\text{H}$  NMR

(300 MHz, DMSO-*d*<sub>6</sub>):  $\delta$  5.92 (d, 1H,  $J = 3.9$  Hz, CH), 6.74 (d, 1H,  $J = 3.9$  Hz, CH), 7.16 (d, 1H,  $J = 8.4$  Hz, Ar-H), 7.25 (dd, 1H,  $J_1 = 8.7$  Hz,  $J_2 = 2.1$  Hz, Ar-H), 7.73 (d, 1H,  $J = 2.1$  Hz, Ar-H), 7.84-7.89 (m, 4H, Ar-H), 7.94-8.02 (m, 3H, Ar-H), 8.05 (d, 2H,  $J = 8.7$  Hz, Ar-H), 8.13-8.16 (m, 1H, Ar-H), 8.28-8.32 (m, 1H, Ar-H), 9.31-9.34 (m, 1H, Ar-H) ppm; <sup>13</sup>C NMR (75 MHz, DMSO-*d*<sub>6</sub>):  $\delta$  49.3 and 90.4 (2CH), 114.9, 122.9, 123.7, 126.1, 128.3, 128.8, 129.0, 129.3, 129.8, 131.1, 131.2, 131.7, 132.1, 132.6, 133.0, 133.2, 134.0, 138.2, 140.0, 140.9, 141.5, 142.3 and 158.5 (C<sub>olefinic</sub> and C<sub>arom</sub>), 193.2 (C=O) ppm; MS (*m/z*, %): 600 (M<sup>+</sup>, 1), 523 (1), 415 (100), 352 (16), 182 (20), 57 (14); Anal. Calcd for C<sub>31</sub>H<sub>17</sub>BrCl<sub>2</sub>N<sub>2</sub>O<sub>2</sub>: C, 62.03; H, 2.85; N, 4.67 %. Found: C, 62.27; H, 2.64; N, 4.76 %.

**(4-Bromophenyl)(1-(4-nitrophenyl)-1,2-dihydrobenzo[*a*]furo[2,3-*c*]phenazin-2-yl)methanone (6d)**

Yellow powder; yield 0.516 g (90%), mp 283-285 °C; IR (KBr):  $\nu_{\max} = 3025, 2905, 1689, 1624, 1593, 1532, 1507, 1447, 1393, 1336, 1223, 1132, 1046, 941, 803, 754$  cm<sup>-1</sup>; <sup>1</sup>H NMR (300 MHz, CDCl<sub>3</sub>):  $\delta$  5.72 (d, 1H,  $J = 4.8$  Hz, CH), 6.10 (d, 1H,  $J = 4.8$  Hz, CH), 7.56-7.70 (m, 7H, Ar-H), 7.78-7.83 (m, 2H, Ar-H), 7.86-7.89 (m, 3H, Ar-H), 8.11-8.14 (m, 3H, Ar-H), 9.34-9.37 (m, 1H, Ar-H) ppm; <sup>13</sup>C NMR (75 MHz, CDCl<sub>3</sub>):  $\delta$  50.5 and 90.6 (2CH), 115.3, 122.3, 124.0, 125.5, 127.3, 128.0, 128.5, 128.7, 129.1, 129.5, 129.7, 130.0, 130.1, 130.2, 130.3, 131.6, 132.5, 132.9, 133.5, 139.3, 140.3, 141.4, 141.5, 142.5, and 157.5 (C<sub>olefinic</sub> and C<sub>arom</sub>), 192.6 (C=O) ppm; MS (*m/z*, %): 576 (M<sup>+</sup>, 1), 530 (1), 384 (2), 344 (48), 271 (68), 57 (100); Anal. Calcd for C<sub>31</sub>H<sub>18</sub>BrN<sub>3</sub>O<sub>4</sub>: C, 64.60; H, 3.15; N, 7.29 %. Found: C, 64.48; H, 3.37; N, 7.53 %.

**(4-bromophenyl)(1-(2-hydroxy-5-nitrophenyl)-1,2-dihydrobenzo[*a*]furo[2,3-*c*]phenazin-2-yl)methanone (6e)**

Green powder; yield 0.503 g (85%), mp 156-157 °C; IR (KBr):  $\nu_{\max} = 3050, 2910, 1688, 1632, 1591, 1527, 1500, 1415, 1386, 1336, 1224, 1152, 1063, 948, 811, 754$  cm<sup>-1</sup>; <sup>1</sup>H NMR (300 MHz, CDCl<sub>3</sub>):  $\delta$  5.74 (d, 1H,  $J = 4.8$  Hz, CH), 6.13 (d, 1H,  $J = 4.5$  Hz, CH), 7.43 (t, 1H,  $J = 7.8$  Hz, Ar-H), 7.60-7.67 (m, 3H, Ar-H), 7.75-7.84 (m, 3H, Ar-H), 7.86-7.90 (m, 3H, Ar-H), 8.03-8.06 (m, 1H, Ar-H), 8.12-8.19 (m, 2H, Ar-H), 8.30 (t, 1H,  $J = 2.1$  Hz, Ar-H), 9.32-9.35 (m, 1H, Ar-H), 10.80 (s, 1H, OH) ppm; <sup>13</sup>C NMR (75 MHz, CDCl<sub>3</sub>):  $\delta$  49.7 and 91.6 (2CH), 114.8, 122.5, 122.7, 123.1, 126.1, 128.7, 129.1, 129.7, 129.8, 130.0, 130.7, 130.9, 131.2, 131.5, 131.6, 132.3, 132.6, 134.2, 137.2, 138.5, 140.2, 141.4, 141.9, 143.9 and 157.8

(C<sub>olefinic</sub> and C<sub>arom</sub>), 192.4 (C=O) ppm; MS (*m/z*, %): 592 (M<sup>+</sup>, 1), 575 (2), 415 (100), 345 (22), 182 (49), 57 (92); Anal. Calcd for C<sub>31</sub>H<sub>18</sub>BrN<sub>3</sub>O<sub>5</sub>: C, 62.85; H, 3.06; N, 7.09 %. Found: C, 62.63; H, 3.15; N, 7.26 %.

**(4-Bromophenyl)(1-(thiophen-2-yl)-1,2-dihydrobenzo[*a*]furo[2,3-*c*]phenazin-2-yl)methanone (6f)**

Brown powder; yield 0.431 g (80%), mp 160 °C; IR (KBr):  $\nu_{\max}$  = 3050, 2895, 1687, 1629, 1579, 1524, 1489, 1412, 1386, 1330, 1219, 1133, 1063, 973, 834, 750 cm<sup>-1</sup>; <sup>1</sup>H NMR (300 MHz, CDCl<sub>3</sub>):  $\delta$  5.79 (d, 1H, *J* = 3.9 Hz, CH), 6.21 (d, 1H, *J* = 3.9 Hz, CH), 7.87-8.89 (m, 1H, Ar-H), 7.05 (d, 1H, *J* = 3.3 Hz, Ar-H), 7.11 (d, 1H, *J* = 4.8 Hz, Ar-H), 7.60-7.68 (m, 5H, Ar-H), 7.76-8.79 (m, 2H, Ar-H), 7.89 (d, 1H, *J* = 8.4 Hz, Ar-H), 7.95-7.98 (m, 1H, Ar-H), 8.14-8.19 (m, 2H, Ar-H), 9.30-9.34 (m, 1H, Ar-H) ppm; <sup>13</sup>C NMR (75 MHz, CDCl<sub>3</sub>):  $\delta$  45.6 and 91.8 (2CH), 115.0, 122.7, 123.9, 124.7, 125.4, 126.0, 127.1, 128.5, 128.8, 128.9, 129.5, 129.6, 129.7, 129.8, 129.9, 130.7, 132.0, 132.3, 132.5, 132.6, 140.2, 141.3, 141.6, 142.5, 145.0, and 157.8 (C<sub>olefinic</sub> and C<sub>arom</sub>), 192.5 (C=O) ppm; MS (*m/z*, %): 537 (M<sup>+</sup>, 1), 426 (2), 353 (100), 246 (18), 183 (14), 76 (5); Anal. Calcd for C<sub>29</sub>H<sub>17</sub>BrN<sub>2</sub>O<sub>2</sub>S: C, 64.81; H, 3.19; N, 5.21; S, 5.97 %. Found: C, 65.06; H, 3.26; N, 5.30; S, 5.82 %.

**(4-bromophenyl)(1-(*p*-tolyl)-1,2-dihydrobenzo[*a*]furo[2,3-*c*]phenazin-2-yl)methanone (6g)**

Green powder; yield 0.441 g (81%), mp 260-263 °C; IR (KBr):  $\nu_{\max}$  = 3045, 2900, 1684, 1633, 1594, 1533, 1500, 1416, 1382, 1331, 1222, 1130, 1063, 978, 828, 749 cm<sup>-1</sup>; <sup>1</sup>H NMR (300 MHz, CDCl<sub>3</sub>):  $\delta$  2.27 (s, 3H, CH<sub>3</sub>), 5.37 (d, 1H, *J* = 3.9 Hz, CH), 6.15 (d, 1H, *J* = 4.2 Hz, CH), 7.06 (d, 2H, *J* = 7.8 Hz, Ar-H), 7.29 (d, 2H, *J* = 7.8 Hz, Ar-H), 7.58-7.66 (m, 4H, Ar-H), 7.77-7.82 (m, 4H, Ar-H), 7.89-7.94 (m, 1H, Ar-H), 8.15-8.22 (m, 2H, Ar-H), 9.32-9.35 (m, 1H, Ar-H) ppm; <sup>13</sup>C NMR (75 MHz, CDCl<sub>3</sub>):  $\delta$  21.1 (CH<sub>3</sub>), 50.6 and 92.2 (2CH), 116.0, 122.6, 124.1, 126.0, 127.7, 128.4, 128.7, 128.8, 129.3, 129.6, 129.7, 129.8, 129.9, 130.6, 132.2, 132.5, 132.6, 137.1, 138.9, 140.2, 141.3, 141.8, 142.5 and 157.9 (C<sub>olefinic</sub> and C<sub>arom</sub>), 192.9 (C=O) ppm; MS (*m/z*, %): 545 (M<sup>+</sup>, 1), 466 (2), 361 (100), 270 (5), 183 (9), 57 (3); Anal. Calcd for C<sub>32</sub>H<sub>21</sub>BrN<sub>2</sub>O<sub>2</sub>: C, 70.47; H, 3.88; N, 5.14 %. Found: C, 70.71; H, 3.69; N, 5.22 %.

**(4-Bromophenyl)(1-(4-methoxyphenyl)-1,2-dihydrobenzo[*a*]furo[2,3-*c*]phenazin-2-yl)methanone (6h)**

Brown powder; yield 0.566 g (83%), mp 180-181 °C; IR (KBr):  $\nu_{\max}$  = 3025, 2895, 1688, 1628, 1583, 1531, 1507, 1410, 1390, 1330, 1223, 1133, 1061, 948, 820, 750  $\text{cm}^{-1}$ ;  $^1\text{H}$  NMR (300 MHz,  $\text{CDCl}_3$ ):  $\delta$  3.68 (s, 3H,  $\text{OCH}_3$ ), 5.35 (d, 1H,  $J$  = 3.9 Hz, CH), 6.12 (d, 1H,  $J$  = 4.2 Hz, CH), 6.77 (d, 2H,  $J$  = 8.4 Hz, Ar-H), 7.30 (d, 2H,  $J$  = 8.7 Hz, Ar-H), 7.53-7.62 (m, 4H, Ar-H), 7.67-7.80 (m, 5H, Ar-H), 8.12-8.19 (m, 2H, Ar-H), 9.29-9.32 (m, 1H, Ar-H) ppm;  $^{13}\text{C}$  NMR (75 MHz,  $\text{CDCl}_3$ ):  $\delta$  50.3 (CH), 55.2 ( $\text{OCH}_3$ ), 92.2 (CH), 114.2, 116.0, 122.6, 124.0, 126.0, 128.4, 128.7, 128.8, 128.9, 129.3, 129.6, 129.7, 129.9, 130.6, 132.2, 132.4, 132.5, 134.0, 140.1, 141.3, 141.8, 142.5 and 158.8 ( $\text{C}_{\text{olefinic}}$  and  $\text{C}_{\text{arom}}$ ), 193.0 (C=O) ppm; MS ( $m/z$ , %): 561 ( $\text{M}^+$ , 1), 425 (1), 377 (100), 246 (20), 183 (12), 76 (4); Anal. Calcd for  $\text{C}_{32}\text{H}_{21}\text{BrN}_2\text{O}_3$ : C, 68.46; H, 3.77; N, 4.99 %. Found: C, 68.57; H, 3.96; N, 5.18 %.

**(4-Bromophenyl)(1-(3,4-dimethoxyphenyl)-1,2-dihydrobenzo[*a*]furo[2,3-*c*]phenazin-2-yl)methanone (6i)**

Brown powder; yield 0.460 g (78%), mp 162-164 °C; IR (KBr):  $\nu_{\max}$  = 3040, 2910, 1688, 1629, 1594, 1551, 1512, 1415, 1386, 1331, 1223, 1137, 1048, 948, 800, 752  $\text{cm}^{-1}$ ;  $^1\text{H}$  NMR (300 MHz,  $\text{CDCl}_3$ ):  $\delta$  3.76 (s, 3H,  $\text{OCH}_3$ ), 3.78 (s, 3H,  $\text{OCH}_3$ ), 5.37 (d, 1H,  $J$  = 4.2 Hz, CH), 6.18 (d, 1H,  $J$  = 4.2 Hz, CH), 6.73 (d, 1H,  $J$  = 8.4 Hz, Ar-H), 6.91 (dd, 1H,  $J_1$  = 8.1 Hz,  $J_2$  = 1.8 Hz, Ar-H), 6.99 (d, 1H,  $J$  = 1.8 Hz, Ar-H), 7.58-7.67 (m, 4H, Ar-H), 7.77-8.84 (m, 4H, Ar-H), 7.89-7.93 (m, 1H, Ar-H), 8.16-8.21 (m, 2H, Ar-H), 9.32-9.35 (m, 1H, Ar-H) ppm;  $^{13}\text{C}$  NMR (75 MHz,  $\text{CDCl}_3$ ):  $\delta$  50.6 (CH), 55.8 and 56.0 ( $2\text{OCH}_3$ ), 92.1 (CH), 111.4, 111.5, 115.8, 119.7, 122.6, 124.0, 126.0, 128.4, 128.7, 129.4, 129.7, 129.8, 129.9, 130.6, 131.7, 131.9, 132.2, 132.4, 132.5, 134.4, 140.1, 141.3, 141.8, 142.5, 148.3, 149.0 and 157.8 ( $\text{C}_{\text{olefinic}}$  and  $\text{C}_{\text{arom}}$ ), 193.0 (C=O) ppm; MS ( $m/z$ , %): 591 ( $\text{M}^+$ , 1), 454 (1), 407 (100), 345 (13), 182 (23), 57 (11); Anal. Calcd for  $\text{C}_{33}\text{H}_{23}\text{BrN}_2\text{O}_4$ : C, 67.01; H, 3.92; N, 4.74 %. Found: C, 67.19; H, 3.85; N, 4.90 %.

**(4-Bromophenyl)(1-(2-hydroxy-3-methoxyphenyl)-1,2-dihydrobenzo[*a*]furo[2,3-*c*]phenazin-2-yl)methanone (6j)**

Orange powder; yield 0.458 g (79%), mp 251-252 °C; IR (KBr):  $\nu_{\max}$  = 3025, 2900, 1674, 1620, 1581, 1524, 1468, 1416, 1392, 1337, 1220, 1133, 1063, 979, 809, 753  $\text{cm}^{-1}$ ;  $^1\text{H}$  NMR (300 MHz,  $\text{CDCl}_3$ ):  $\delta$  3.82 (s, 3H,  $\text{OCH}_3$ ), 5.67 (d, 1H,  $J$  = 3.0 Hz, CH), 6.55 (d, 1H,  $J$  = 3.0

Hz, CH), 6.74-6.77 (m, 1H, Ar-H), 6.85 (t, 1H,  $J = 7.8$  Hz, Ar-H), 7.07 (d, 1H,  $J = 6.9$  Hz, Ar-H), 7.55 (d, 2H,  $J = 8.4$  Hz, Ar-H), 7.66-7.82 (m, 6H, Ar-H), 8.15-8.21 (m, 3H, Ar-H), 9.25-9.28 (m, 1H, Ar-H), 10.12 (s, 1H, OH) ppm;  $^{13}\text{C}$  NMR (75 MHz,  $\text{CDCl}_3$ ):  $\delta$  44.0 (CH), 56.0 ( $\text{OCH}_3$ ), 90.3 (CH), 111.0, 116.1, 118.1, 121.5, 122.7, 124.1, 126.0, 127.5, 128.7, 129.0, 129.4, 129.8, 129.9, 130.2, 130.3, 130.7, 131.8, 132.1, 132.4, 140.3, 140.6, 141.9, 143.8, 150.5 and 158.5 ( $\text{C}_{\text{olefinic}}$  and  $\text{C}_{\text{arom}}$ ), 192.4 ( $\text{C}=\text{O}$ ) ppm; MS ( $m/z$ , %): 577 ( $\text{M}^+$ , 1), 407 (1), 358 (96), 285 (100), 142 (6), 89 (4); Anal. Calcd for  $\text{C}_{32}\text{H}_{21}\text{BrN}_2\text{O}_4$ : C, 66.56; H, 3.67; N, 4.85 %. Found: C, 66.78; H, 3.90; N, 4.89 %.

**(4-bromophenyl)(1-(4-chlorophenyl)-11-methyl-1,2-dihydrobenzo[*a*]furo[2,3-*c*]phenazin-2-yl)methanone (6k)**

Yellow powder; yield 0.504 g (87%), mp 307-309 °C; IR (KBr):  $\nu_{\text{max}} = 3025, 2910, 1690, 1624, 1593, 1530, 1501, 1405, 1352, 1315, 1225, 1132, 1047, 1003, 817, 761$   $\text{cm}^{-1}$ ;  $^1\text{H}$  NMR (300 MHz,  $\text{CDCl}_3$ ):  $\delta$  2.54 (s, 3H,  $\text{CH}_3$ ), 5.45 (d, 1H,  $J = 4.2$  Hz, CH), 6.08 (d, 1H,  $J = 4.2$  Hz, CH), 7.22 (d, 2H,  $J = 8.4$  Hz, Ar-H), 7.32 (d, 2H,  $J = 8.4$  Hz, Ar-H), 7.49 (dd, 1H,  $J_1 = 8.7$  Hz,  $J_2 = 1.8$  Hz, Ar-H), 7.61 (d, 2H,  $J = 8.4$  Hz, Ar-H), 7.76-7.83 (m, 5H, Ar-H), 7.95 (s, 1H, Ar-H), 8.14-8.17 (m, 1H, Ar-H), 9.29-9.33 (m, 1H, Ar-H) ppm;  $^{13}\text{C}$  NMR (75 MHz,  $\text{CDCl}_3$ ):  $\delta$  21.9 ( $\text{CH}_3$ ), 50.1 and 91.9 (2CH), 115.4, 122.6, 126.0, 128.2, 128.3, 128.4, 128.7, 129.0, 129.2, 129.4, 129.8, 130.6, 131.1, 132.3, 132.5, 132.6, 133.2, 135.0, 137.1, 137.2, 139.2, 140.5, 141.0, 157.4 and 157.7 ( $\text{C}_{\text{olefinic}}$  and  $\text{C}_{\text{arom}}$ ), 192.8 ( $\text{C}=\text{O}$ ) ppm; MS ( $m/z$ , %): 579 ( $\text{M}^+$ , 1), 439 (1), 395 (27), 260 (100), 130 (12), 57 (14); Anal. Calcd for  $\text{C}_{32}\text{H}_{20}\text{BrClN}_2\text{O}_2$ : C, 66.28; H, 3.48; N, 4.83 %. Found: C, 66.45; H, 3.51; N, 4.98 %.

**(4-bromophenyl)(11-methyl-1-(4-nitrophenyl)-1,2-dihydrobenzo[*a*]furo[2,3-*c*]phenazin-2-yl)methanone (6l)**

Yellow powder; yield 0.511 g (87%), mp 296-297 °C; IR (KBr):  $\nu_{\text{max}} = 3045, 2900, 1690, 1629, 1594, 1563, 1508, 1480, 1391, 1330, 1226, 1144, 1062, 943, 820, 761$   $\text{cm}^{-1}$ ;  $^1\text{H}$  NMR (300 MHz,  $\text{CDCl}_3$ ):  $\delta$  2.51 (s, 3H,  $\text{CH}_3$ ), 5.72 (d, 1H,  $J = 4.5$  Hz, CH), 6.07 (d, 1H,  $J = 4.5$  Hz, CH), 7.49-7.64 (m, 6H, Ar-H), 7.76-7.88 (m, 5H, Ar-H), 8.09-8.13 (m, 3H, Ar-H), 9.32-9.35 (m, 1H, Ar-H) ppm;  $^{13}\text{C}$  NMR (75 MHz,  $\text{CDCl}_3$ ):  $\delta$  21.7 ( $\text{CH}_3$ ), 51.2 and 90.4 (2CH), 110.9, 115.9, 118.1, 121.5, 122.8, 124.1, 126.1, 127.4, 128.8, 129.0, 129.4, 129.7, 129.9, 130.2, 130.4, 130.6, 131.8, 132.0, 132.4, 140.2, 140.6, 141.8, 143.9, 150.6 and 158.4 ( $\text{C}_{\text{olefinic}}$  and  $\text{C}_{\text{arom}}$ ), 192.3 ( $\text{C}=\text{O}$ ) ppm; MS ( $m/z$ , %): 590 ( $\text{M}^+$ , 1), 406 (100), 360 (20), 284 (7), 184

(16), 57 (20); Anal. Calcd for C<sub>32</sub>H<sub>20</sub>BrN<sub>3</sub>O<sub>4</sub>: C, 65.10; H, 3.41; N, 7.12 %. Found: C, 65.33; H, 3.52; N, 7.01 %.

**(4-Bromophenyl)(11-methyl-1-(*p*-tolyl)-1,2-dihydrobenzo[*a*]furo[2,3-*c*]phenazin-2-yl)methanone (6m)**

Brown powder; yield 0.449 g (80%), mp 205-207 °C; IR (KBr):  $\nu_{\max}$  = 2995, 2910, 1692, 1631, 1595, 1532, 1502, 1479, 1396, 1331, 1223, 1147, 1049, 950, 820, 758 cm<sup>-1</sup>; <sup>1</sup>H NMR (300 MHz, CDCl<sub>3</sub>):  $\delta$  2.33 (s, 3H, CH<sub>3</sub>), 2.57 (s, 3H, CH<sub>3</sub>), 5.48 (d, 1H, *J* = 4.2 Hz, CH), 6.23 (d, 1H, *J* = 3.9 Hz, CH), 7.16 (d, 2H, *J* = 7.2 Hz, Ar-H), 7.38 (d, 2H, *J* = 7.8 Hz, Ar-H), 7.53-7.58 (m, 2H, Ar-H), 7.68 (d, 2H, *J* = 8.4 Hz, Ar-H), 7.82-8.82 (m, 5H, Ar-H), 8.27-8.30 (m, 1H, Ar-H), 9.37-9.41 (m, 1H, Ar-H) ppm; <sup>13</sup>C NMR (75 MHz, CDCl<sub>3</sub>):  $\delta$  21.1 and 21.9 (2CH<sub>3</sub>), 50.6 and 92.1 (2CH), 116.0, 122.5, 123.8, 125.8, 125.9, 127.4, 127.7, 128.1, 128.3, 128.5, 128.6, 129.1, 129.3, 129.6, 129.7, 130.6, 131.0, 132.2, 132.3, 132.5, 137.0, 138.8, 139.0, 140.3, 141.1, 142.6, 157.4 and 157.7 (C<sub>olefinic</sub> and C<sub>arom</sub>), 193.0 (C=O) ppm; MS (*m/z*, %): 559 (M<sup>+</sup>, 1), 440 (2), 375 (100), 260 (20), 183 (10), 57 (3); Anal. Calcd for C<sub>33</sub>H<sub>23</sub>BrN<sub>2</sub>O<sub>2</sub>: C, 70.85; H, 4.14; N, 5.01 %. Found: C, 70.77; H, 3.37; N, 5.25 %.

**(4-Bromophenyl)(1-(4-chlorophenyl)-10-nitro-1,2-dihydrobenzo[*a*]furo[2,3-*c*]phenazin-2-yl)methanone (6n)**

Yellow powder; yield 0.518 g (85%), mp 275-277 °C; IR (KBr):  $\nu_{\max}$  = 3055, 2900, 1684, 1625, 1590, 1551, 1514, 1415, 1388, 1332, 1220, 1125, 1046, 1005, 818, 761 cm<sup>-1</sup>; <sup>1</sup>H NMR (300 MHz, CDCl<sub>3</sub>):  $\delta$  5.43 (d, 1H, *J* = 4.5 Hz, CH), 6.16 (d, 1H, *J* = 4.5 Hz, CH), 7.23-7.35 (m, 4H, Ar-H), 7.63 (d, 2H, *J* = 8.7 Hz, Ar-H), 7.80-7.88 (m, 4H, Ar-H), 8.00 (d, 1H, *J* = 9.3 Hz, Ar-H), 8.19-8.22 (m, 1H, Ar-H), 8.40 (dd, 1H, *J*<sub>1</sub> = 8.7 Hz, *J*<sub>2</sub> = 2.4 Hz, Ar-H), 9.11 (d, 1H, *J* = 2.4 Hz, Ar-H), 9.31-9.35 (m, 1H, Ar-H) ppm; <sup>13</sup>C NMR (75 MHz, CDCl<sub>3</sub>):  $\delta$  49.8 and 92.2 (2CH), 115.6, 122.9, 123.1, 126.4, 126.5, 128.6, 128.8, 128.9, 129.0, 129.1, 129.2, 129.8, 130.2, 130.6, 131.0, 132.4, 132.5, 139.8, 140.4, 141.3, 141.5, 142.5 and 157.9 (C<sub>olefinic</sub> and C<sub>arom</sub>), 192.2 (C=O) ppm; MS (*m/z*, %): 610 (M<sup>+</sup>, 1), 551 (1), 426 (53), 291 (100), 182 (23), 43 (44); Anal. Calcd for C<sub>31</sub>H<sub>17</sub>BrClN<sub>3</sub>O<sub>4</sub>: C, 60.95; H, 2.81; N, 6.88 %. Found: C, 70.19; H, 2.88; N, 6.98 %.

**(4-bromophenyl)(10-nitro-1-(4-nitrophenyl)-1,2-dihydrobenzo[*a*]furo[2,3-*c*]phenazin-2-yl)methanone (6o)**



Yellow powder; yield 0.544 g (88%), mp 312-314 °C; IR (KBr):  $\nu_{\max}$  = 3070, 2910, 1688, 1629, 1589, 1552, 1510, 1412, 1386, 1337, 1225, 1141, 1046, 979, 822, 762  $\text{cm}^{-1}$ ;  $^1\text{H}$  NMR (300 MHz,  $\text{CDCl}_3$ ):  $\delta$  5.69 (d, 1H,  $J$  = 4.5 Hz, CH), 6.16 (d, 1H,  $J$  = 4.5 Hz, CH), 7.53-7.59 (m, 2H, Ar-H), 7.65 (d, 2H,  $J$  = 8.7 Hz, Ar-H), 7.88-7.89 (m, 4H, Ar-H), 8.13-8.20 (m, 3H, Ar-H), 8.33 (d, 1H,  $J$  = 9.3 Hz, Ar-H), 8.42 (dd, 1H,  $J_1$  = 9.3 Hz,  $J_2$  = 2.4 Hz, Ar-H), 8.80 (d, 1H,  $J$  = 2.4 Hz, Ar-H), 9.34-9.37 (m, 1H, Ar-H) ppm;  $^{13}\text{C}$  NMR (75 MHz,  $\text{CDCl}_3$ ):  $\delta$  51.1 and 90.5 (2CH), 113.8, 115.8, 122.2, 123.4, 125.3, 125.5, 127.1, 128.1, 129.2, 130.3, 130.4, 130.9, 131.0, 132.2, 133.0, 133.5, 137.3, 139.9, 140.2, 141.1, 141.7, 143.0 and 157.3 ( $\text{C}_{\text{olefinic}}$  and  $\text{C}_{\text{arom}}$ ), 191.7 (C=O) ppm; MS ( $m/z$ , %): 621 ( $\text{M}^+$ , 1), 577 (2), 437 (17), 375 (65), 184 (33), 43 (100); Anal. Calcd for  $\text{C}_{31}\text{H}_{17}\text{BrN}_4\text{O}_6$ : C, 59.92; H, 2.76; N, 9.02 %. Found: C, 60.11; H, 2.59; N, 8.90 %.

**(4-bromophenyl)(1-(2-chlorophenyl)-10-nitro-1,2-dihydrobenzo[*a*]furo[2,3-*c*]phenazin-2-yl)methanone (6p)**

Yellow powder; yield 0.521 g (85%), mp 300 °C; IR (KBr):  $\nu_{\max}$  = 3030, 2900, 1686, 1627, 1583, 1526, 1493, 1409, 1386, 1333, 1223, 1145, 1048, 1004, 808, 757  $\text{cm}^{-1}$ ;  $^1\text{H}$  NMR (300 MHz,  $\text{CDCl}_3$ ):  $\delta$  6.07 (d, 1H,  $J$  = 4.2 Hz, CH), 6.18 (d, 1H,  $J$  = 4.2 Hz, CH), 7.06-7.14 (m, 3H, Ar-H), 7.34 (d, 1H,  $J$  = 7.8 Hz, Ar-H), 7.62 (d, 2H,  $J$  = 8.4 Hz, Ar-H), 7.83-7.88 (m, 4H, Ar-H), 8.14-8.17 (m, 1H, Ar-H), 8.32 (d, 1H,  $J$  = 9.3 Hz, Ar-H), 8.40 (dd, 1H,  $J_1$  = 9.3 Hz,  $J_2$  = 2.4 Hz, Ar-H), 8.83 (d, 1H,  $J$  = 2.4 Hz, Ar-H), 9.34-9.37 (m, 1H, Ar-H) ppm;  $^{13}\text{C}$  NMR (75 MHz,  $\text{CDCl}_3$ ):  $\delta$  50.3 and 91.3 (2CH), 113.9, 122.9, 125.2, 125.3, 127.1, 127.2, 128.1, 128.2, 128.9, 129.0, 129.1, 129.6, 129.7, 129.9, 131.6, 132.2, 132.8, 132.9, 140.1, 140.5, 141.4, 141.5, 142.8 and 156.9 ( $\text{C}_{\text{olefinic}}$  and  $\text{C}_{\text{arom}}$ ), 192.5 (C=O) ppm; MS ( $m/z$ , %): 610 ( $\text{M}^+$ , 1), 572 (1), 426 (100), 316 (20), 182 (20), 76 (6); Anal. Calcd for  $\text{C}_{31}\text{H}_{17}\text{BrClN}_3\text{O}_4$ : C, 60.95; H, 2.81; N, 6.88 %. Found: C, 61.12; H, 2.94; N, 6.71 %.

Dr.maghsodlou- code 351(yazdani)-

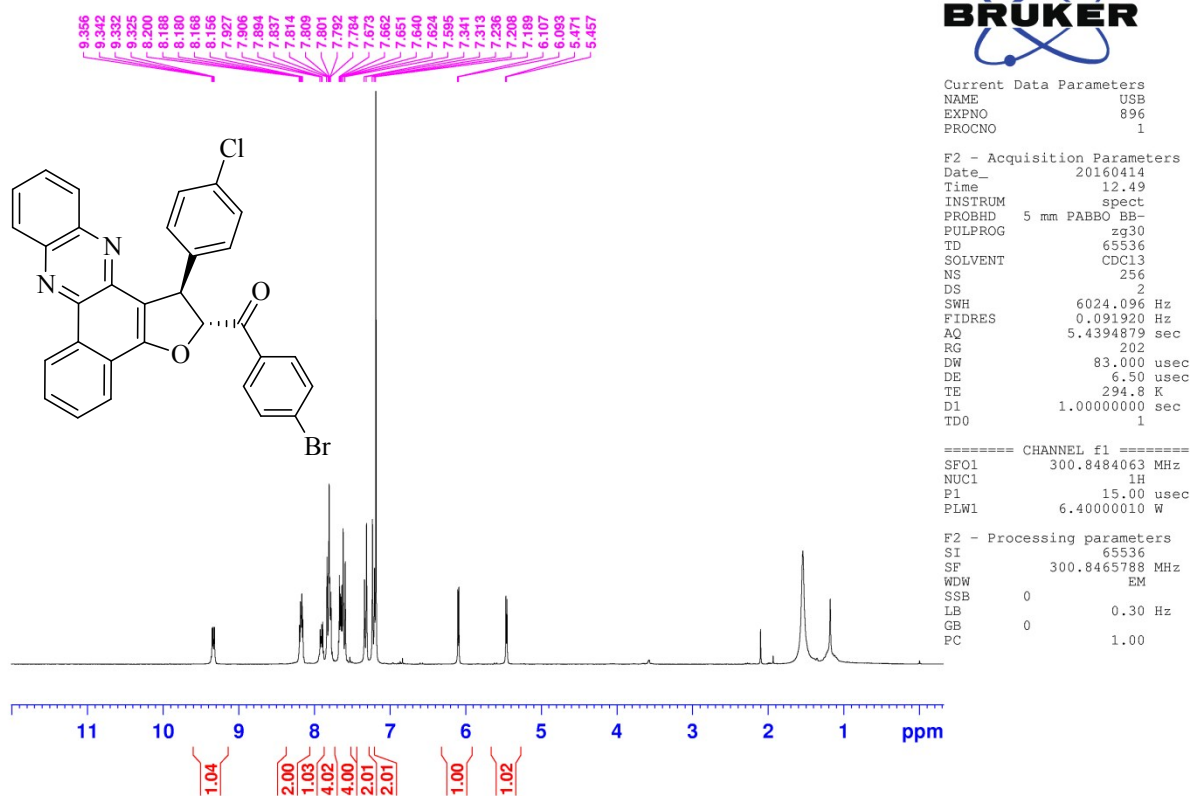

Figure 1:  $^1\text{H}$  NMR spectrum of compound 6a (300 MHz,  $\text{CDCl}_3$ ).

13C-Dr.maghsodlou- code 351(yazdani)-

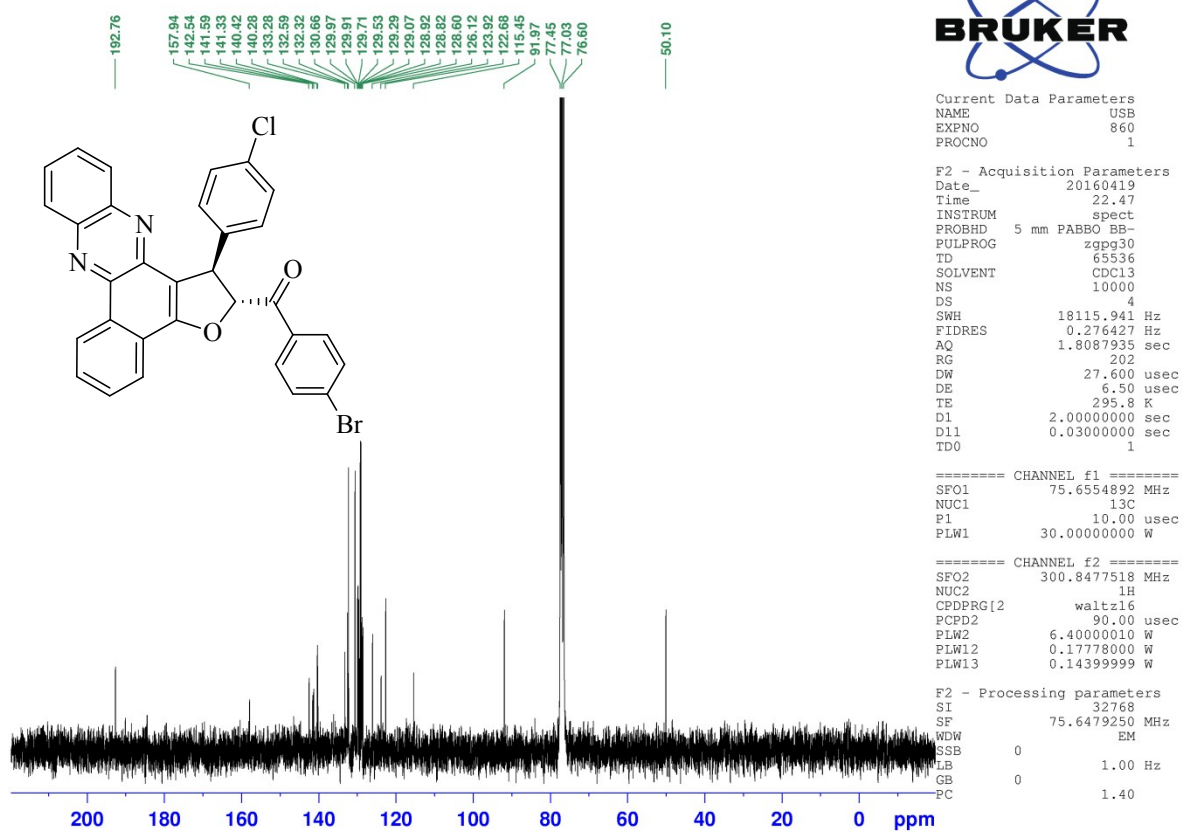

**Figure 2:**  $^{13}\text{C}$  NMR spectrum of compound **6a** (75 MHz,  $\text{CDCl}_3$ ).

13C-Dr.mahsodlou- code 351 (yazdani) -

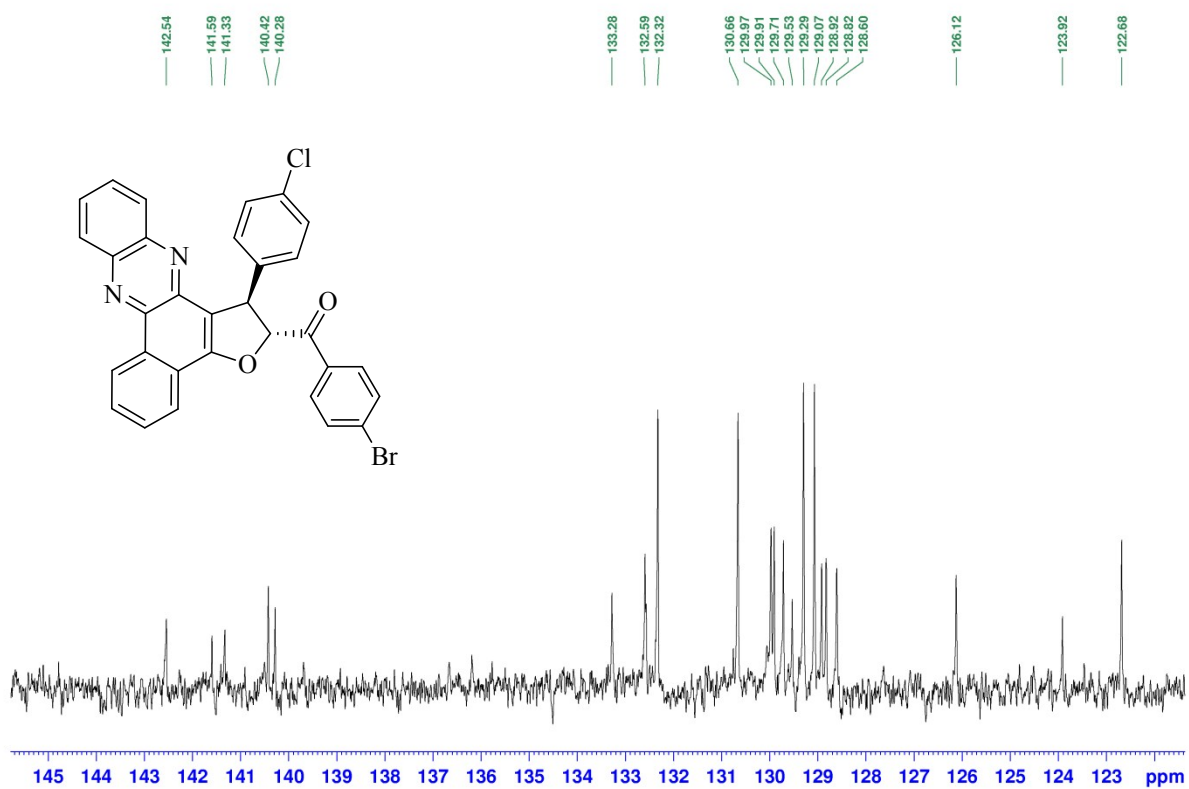

**Figure 3:** Expanded <sup>13</sup>C NMR spectrum of compound **6a** (75 MHz, CDCl<sub>3</sub>).

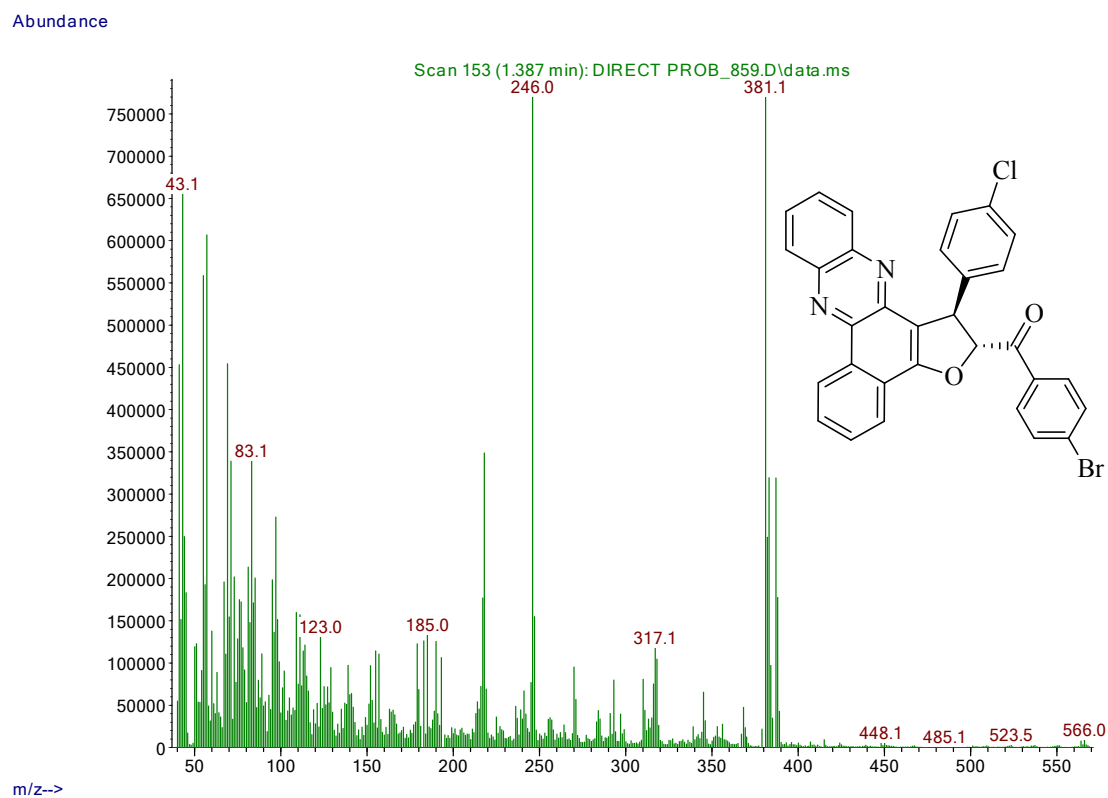

**Figure 4:** Mass spectrum of compound **6a**.

Dr.maghsodlou- code 357(yazdani)-

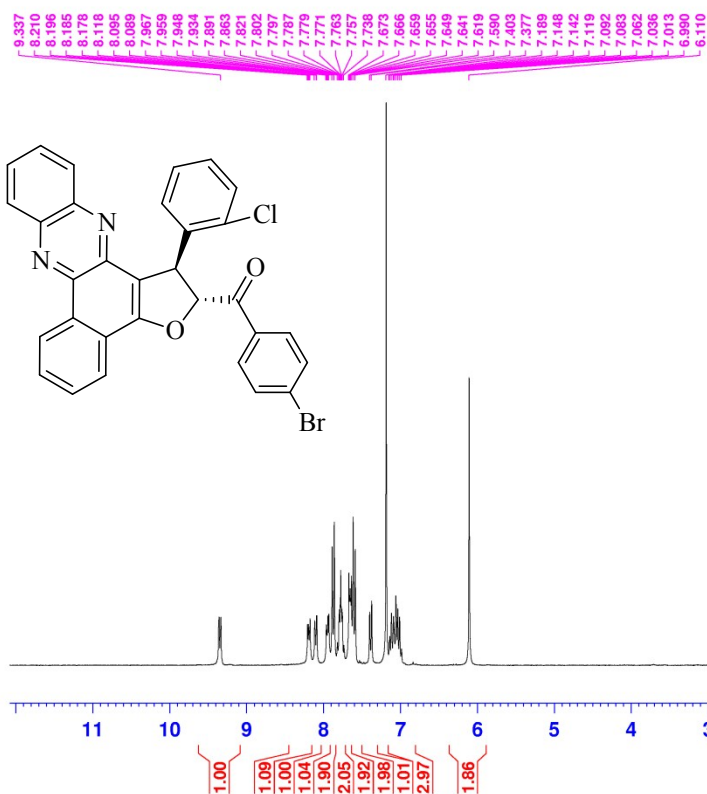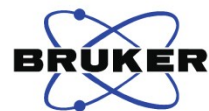

Current Data Parameters  
NAME USB  
EXPNO 839  
PROCNO 1

F2 - Acquisition Parameters  
Date\_ 20160416  
Time 9.31  
INSTRUM spect  
PROBHD 5 mm PABBO BB-  
PULPROG zg30  
TD 65536  
SOLVENT CDCl3  
NS 80  
DS 2  
SWH 6024.096 Hz  
FIDRES 0.091920 Hz  
AQ 5.4394879 sec  
RG 202  
DW 83.000 usec  
DE 6.50 usec  
TE 294.8 K  
D1 1.00000000 sec  
TD0 1

==== CHANNEL f1 =====  
SF01 300.8484063 MHz  
NUC1 1H  
P1 15.00 usec  
PLW1 6.40000010 W

F2 - Processing parameters  
SI 65536  
SF 300.8465791 MHz  
WDW EM  
SSB 0  
LB 0.30 Hz  
GB 0  
PC 1.00

**Figure 5:**  $^1\text{H}$  NMR spectrum of compound **6b** (300 MHz,  $\text{CDCl}_3$ ).

13C-Dr.magnsodlou- code 357(yazdani)-

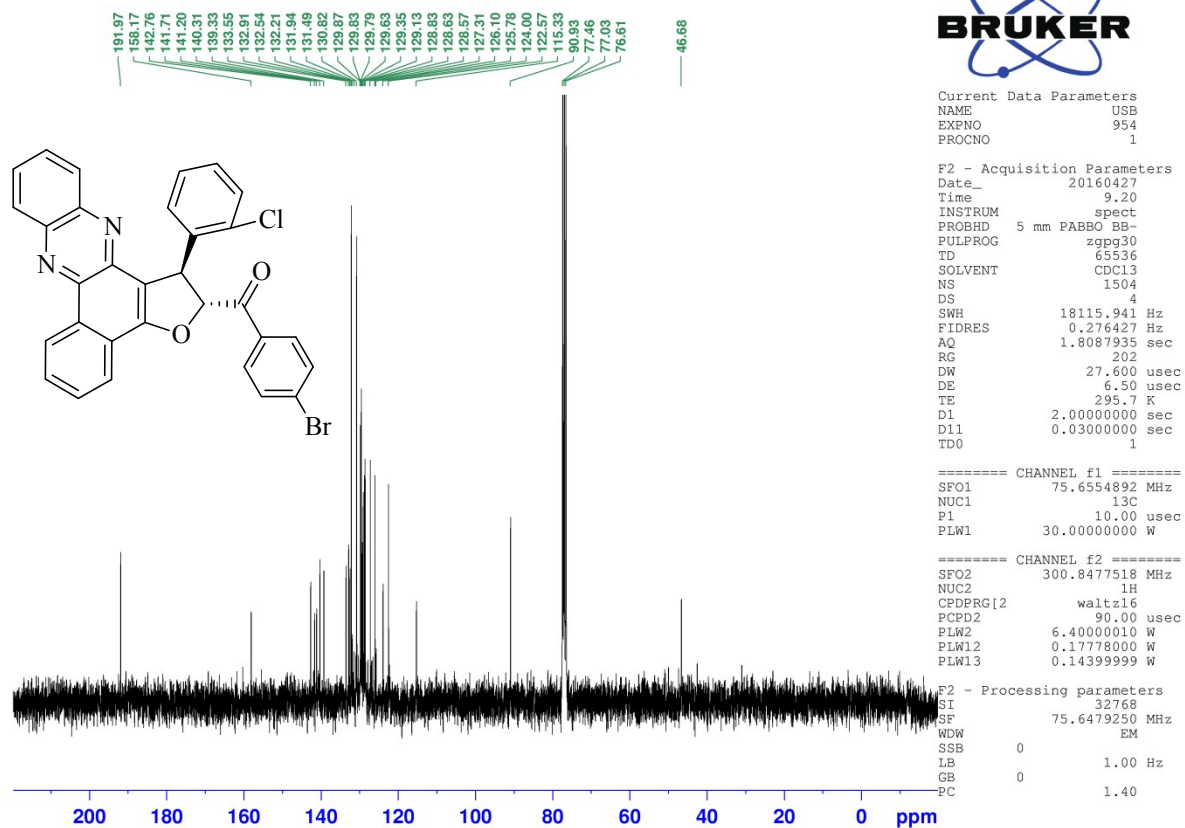

**Figure 6:**  $^{13}\text{C}$  NMR spectrum of compound **6b** (75 MHz,  $\text{CDCl}_3$ ).

<sup>13</sup>C-Dr.magnsodlou- code 357 (yazdani) -

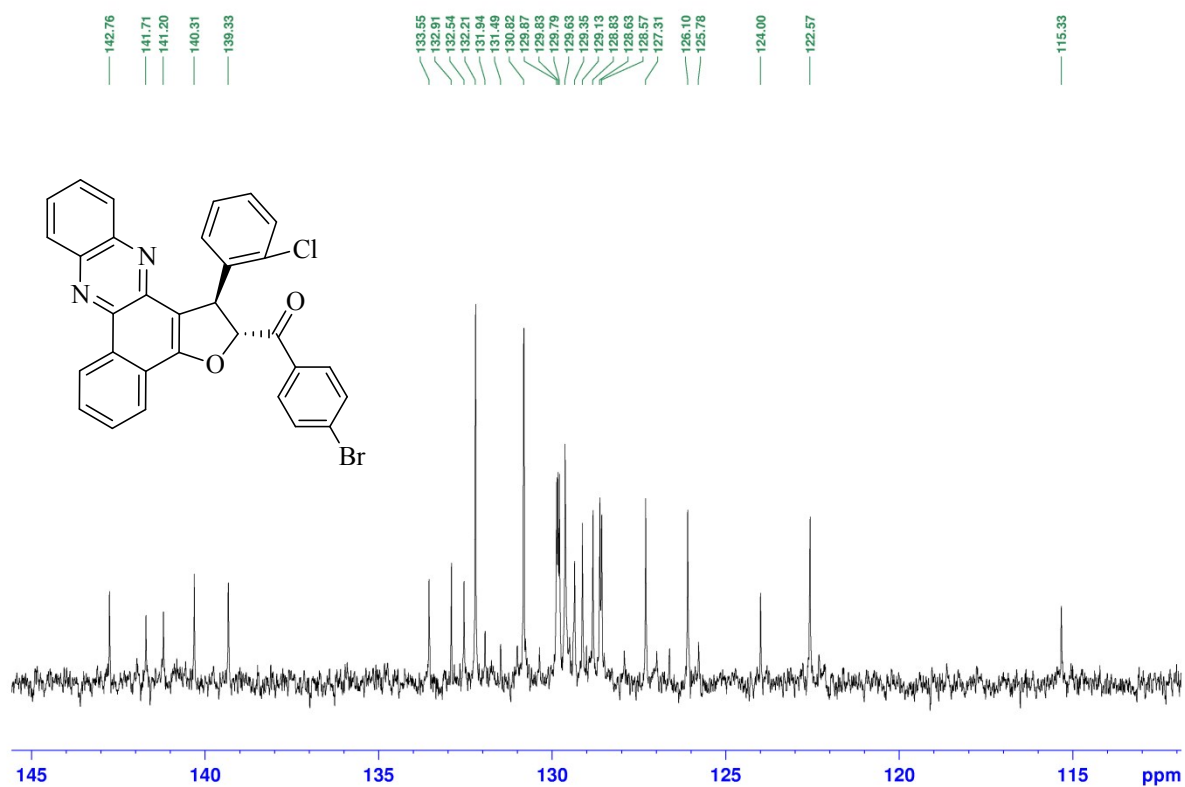

**Figure 7:** Expanded <sup>13</sup>C NMR spectrum of compound **6b** (75 MHz, CDCl<sub>3</sub>).



Abundance

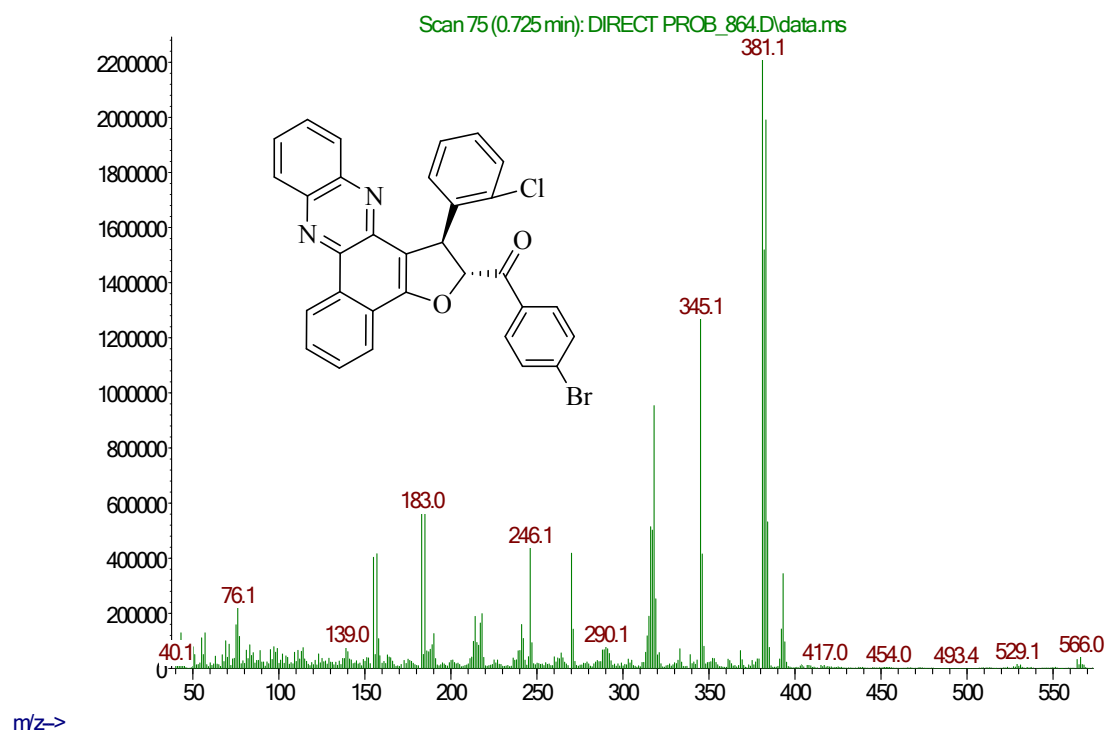

**Figure 8:** Mass spectrum of compound **6b**.

Dr.magnsodlou- code 352(yazdani)-

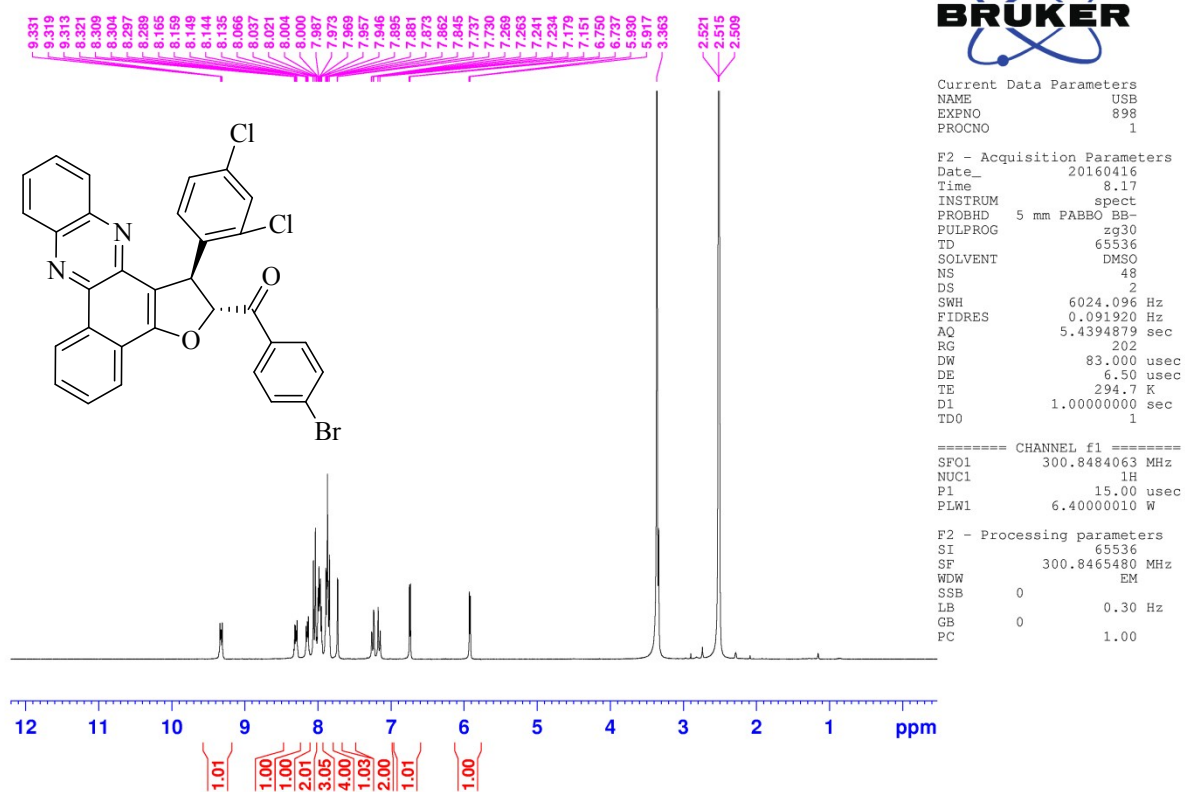

**Figure 9:**  $^1\text{H}$  NMR spectrum of compound **6c** (300 MHz, DMSO).

13C-Dr.maghsodlou- code 352 (yazdani)-

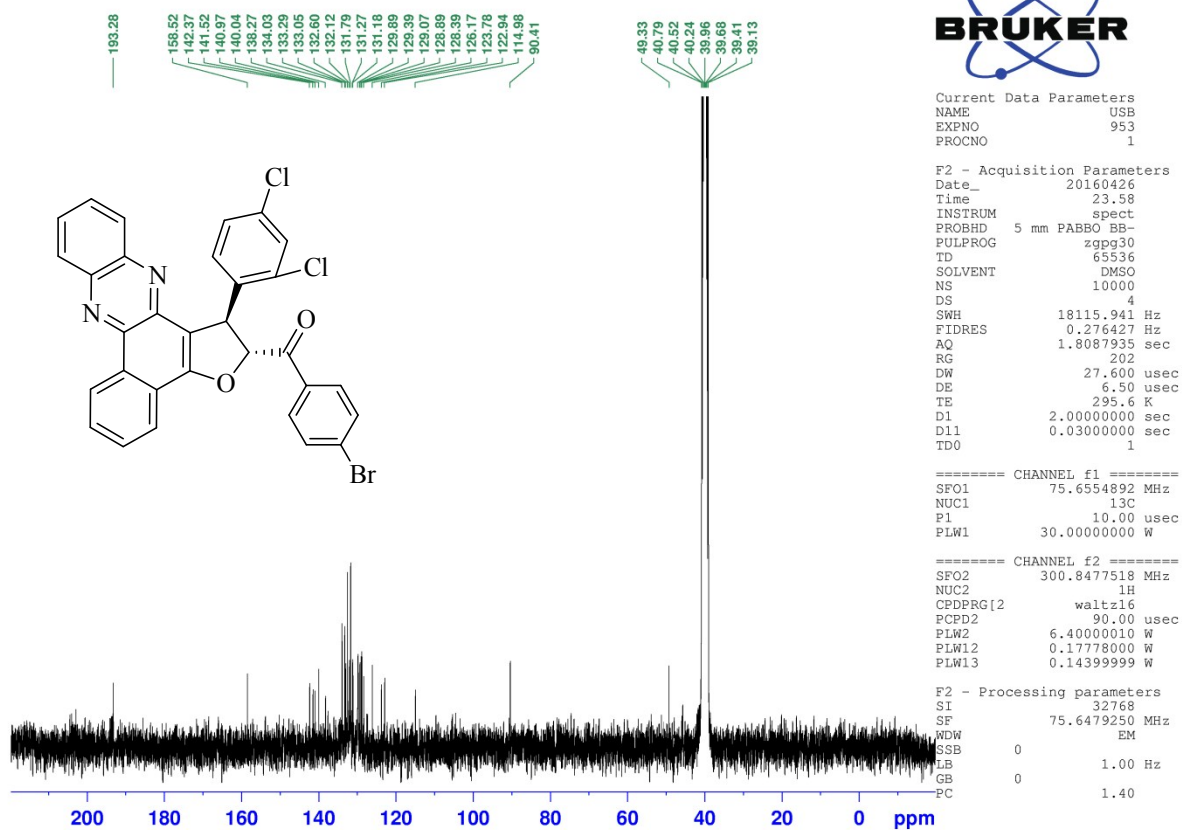

**Figure 10:**  $^{13}\text{C}$  NMR spectrum of compound **6c** (75 MHz, DMSO).

13C-Dr.maghsodlou- code 352 (yazdani) -

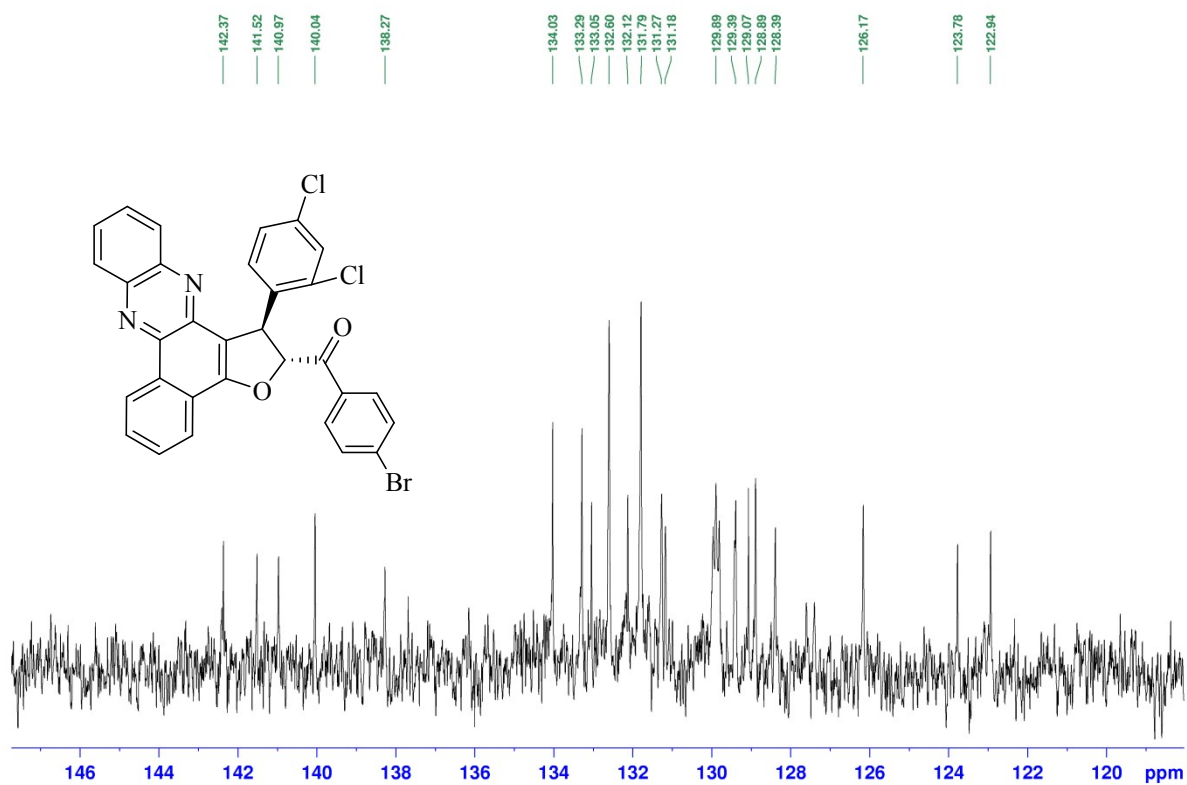

**Figure 11:** Expanded  $^{13}\text{C}$  NMR spectrum of compound **6c** (75 MHz,  $\text{CDCl}_3$ ).

Abundance

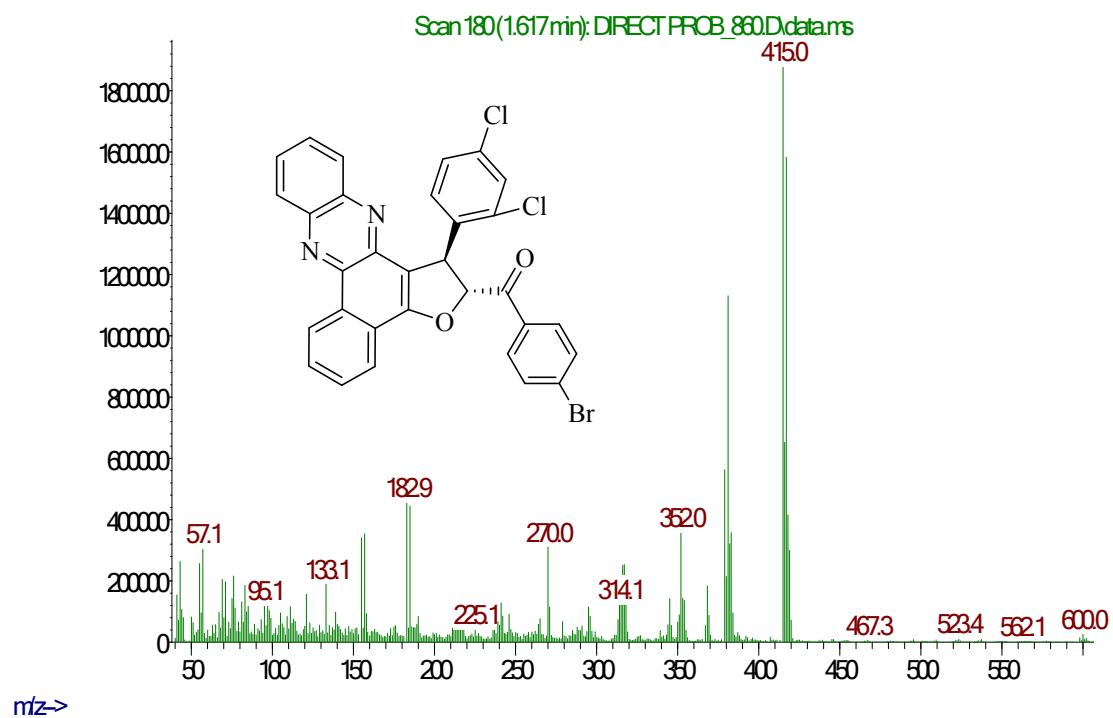

Figure 12: Mass spectrum of compound 6c.

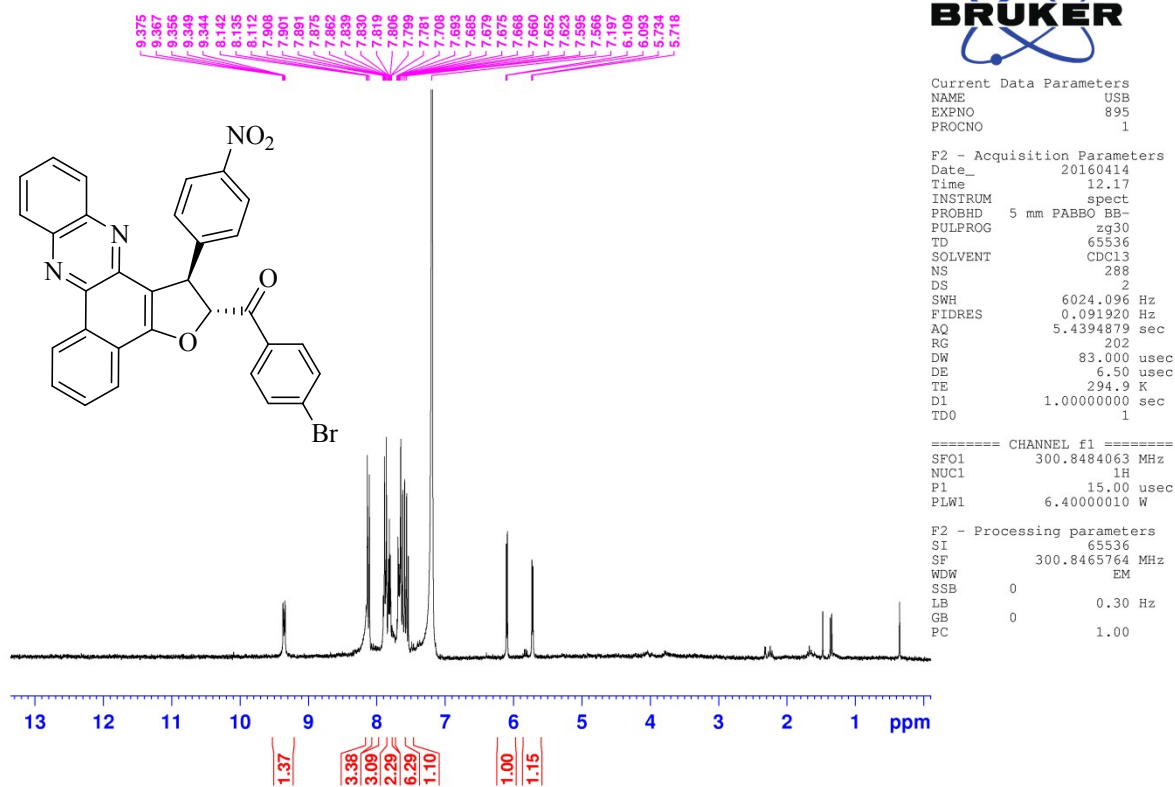

Figure 12: <sup>1</sup>H NMR spectrum of compound 6d (300 MHz, CDCl<sub>3</sub>).

13C-Dr.magnsodlou- code 188(yazdani)-

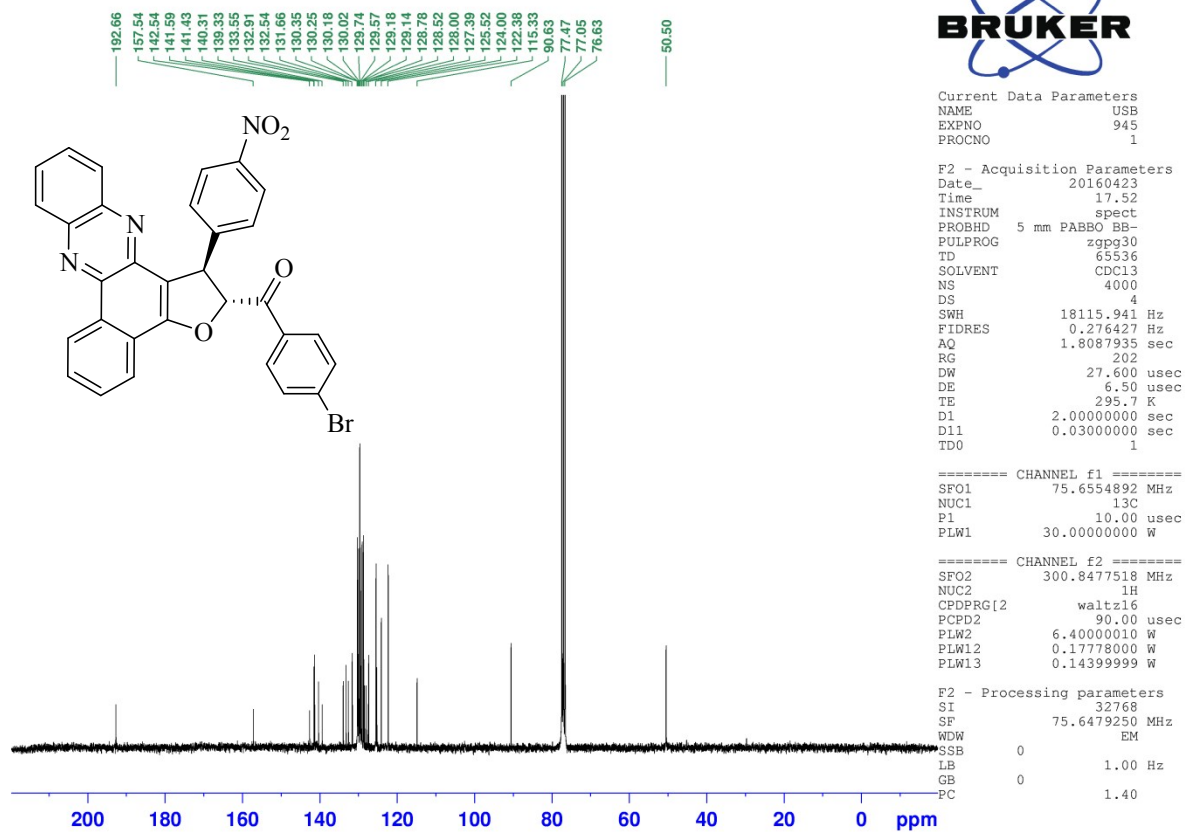

Figure 14:  $^{13}\text{C}$  NMR spectrum of compound 6d (75 MHz,  $\text{CDCl}_3$ ).

Abundance

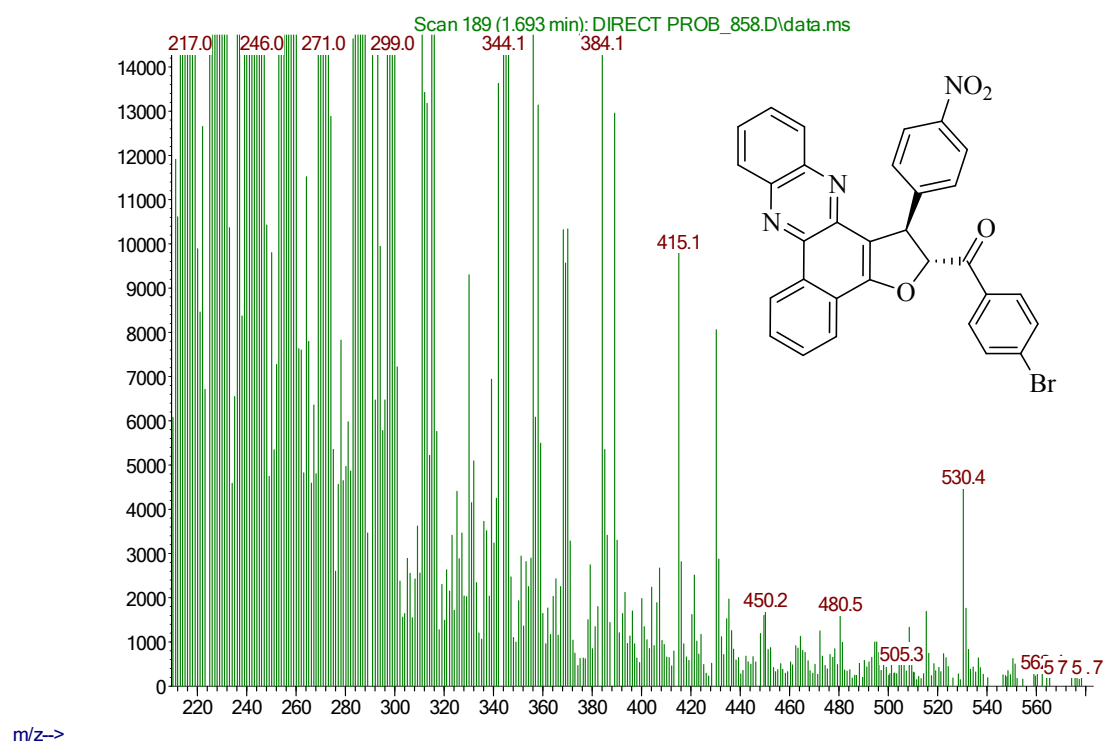

**Figure 15:** Mass spectrum of compound 6d.



Dr.maghsodlou- code 354 (yazdani)-

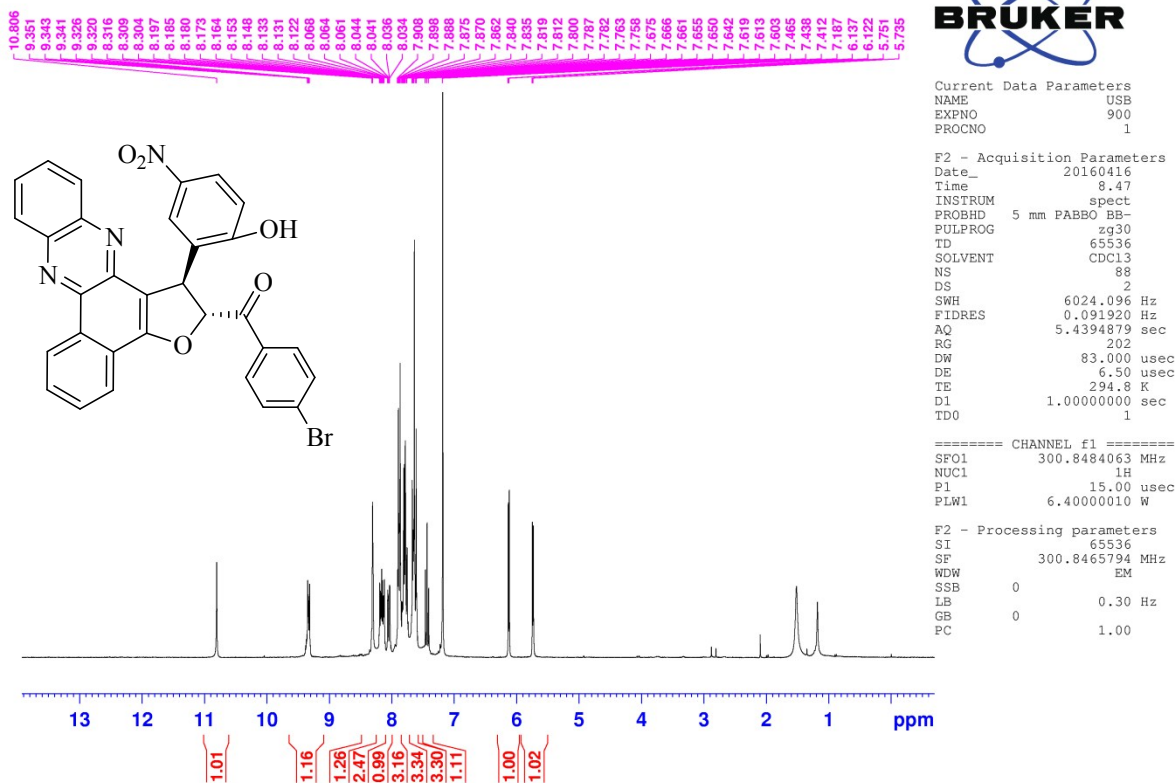

Figure 16:  $^1\text{H}$  NMR spectrum of compound **6e** (300 MHz,  $\text{CDCl}_3$ ).

13C-Dr.mahsodlou- code 354 (yazdani)-

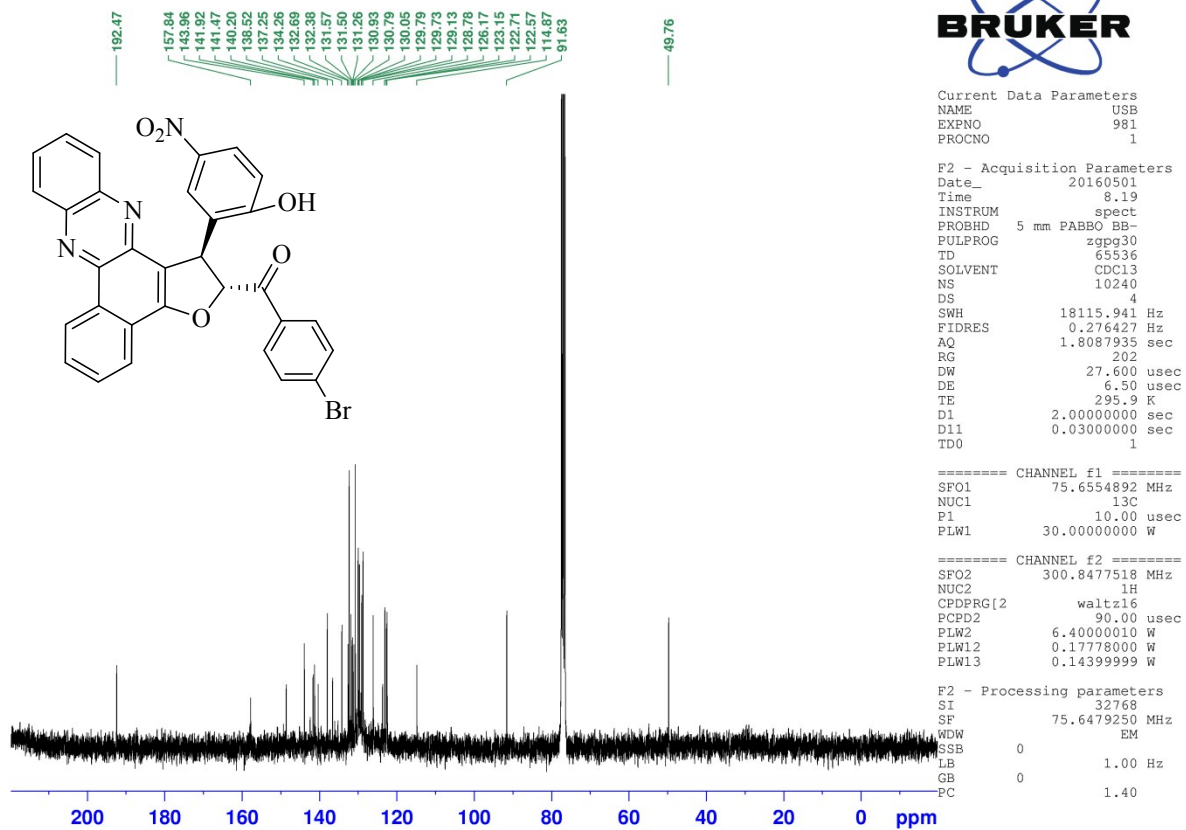

Figure 17:  $^{13}\text{C}$  NMR spectrum of compound 6e (75 MHz,  $\text{CDCl}_3$ ).

<sup>13</sup>C-Dr.maghsodlou- code 354 (yazdani)-

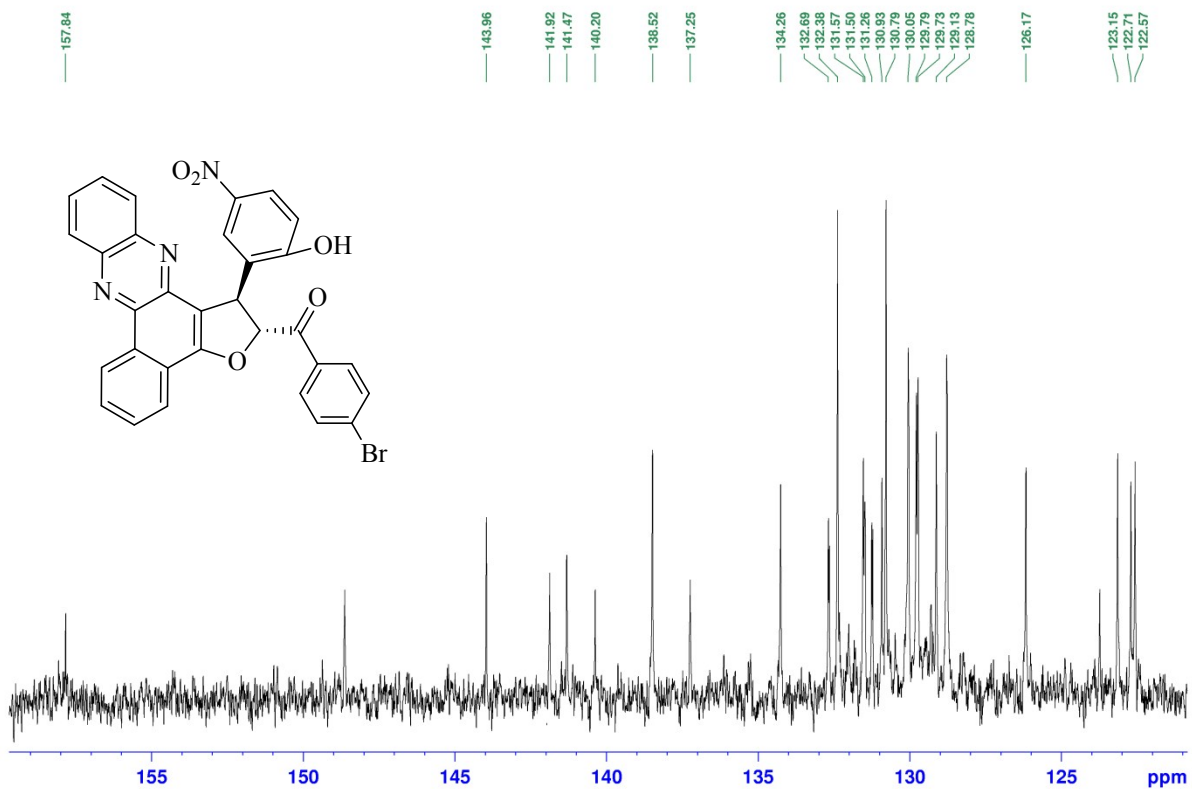

**Figure 18:** Expanded <sup>13</sup>C NMR spectrum of compound **6e** (75 MHz, CDCl<sub>3</sub>).

Abundance

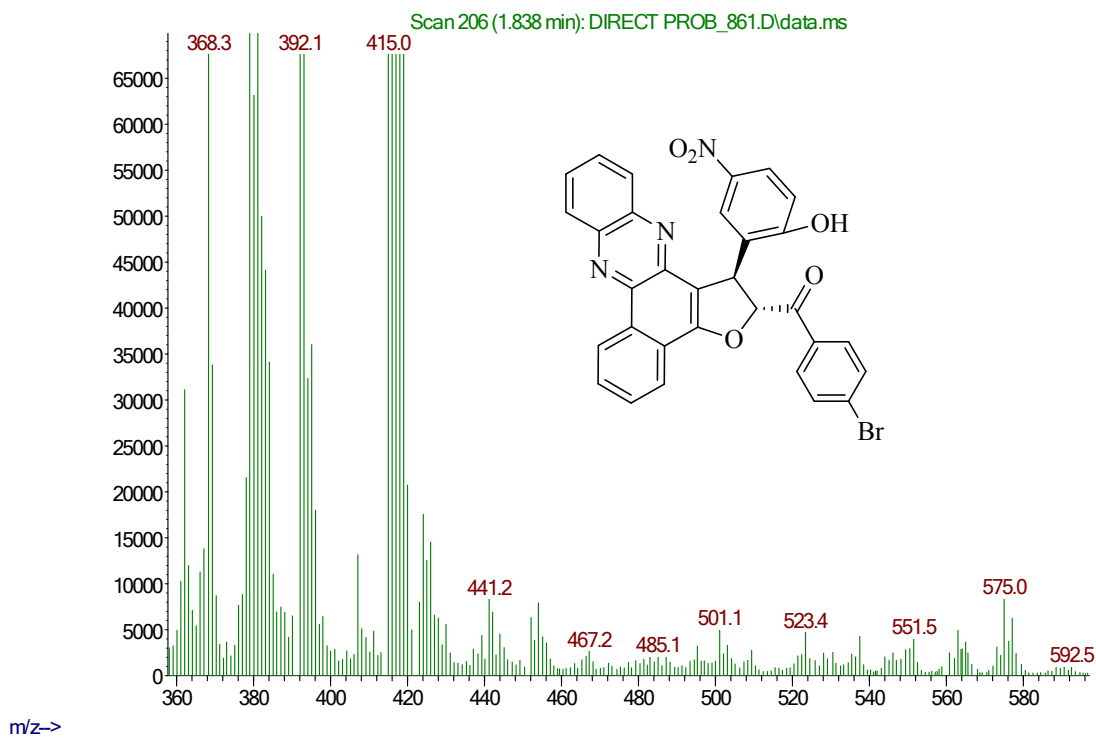

**Figure 19:** Mass spectrum of compound **6e**.

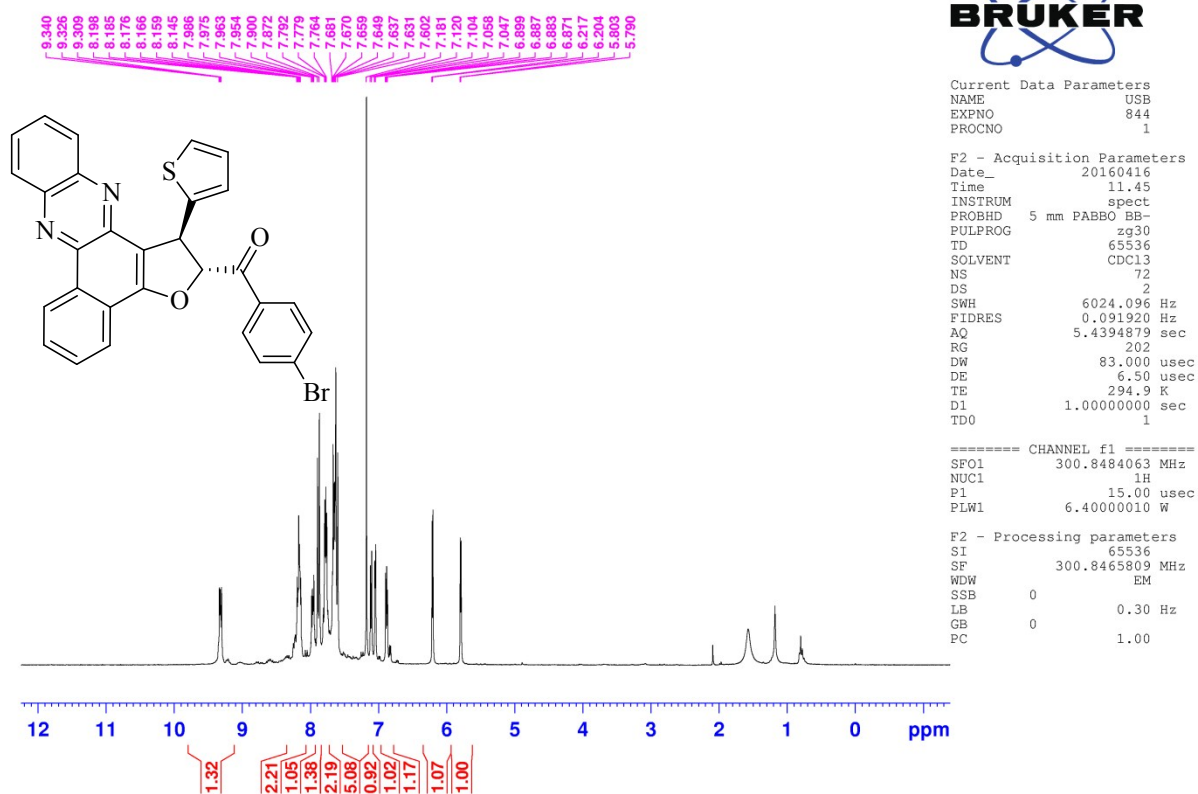

**Figure 20:**  $^1\text{H}$  NMR spectrum of compound **6f** (300 MHz,  $\text{CDCl}_3$ ).

13C-Dr.magnsodlou- code 362 (yazdani)-

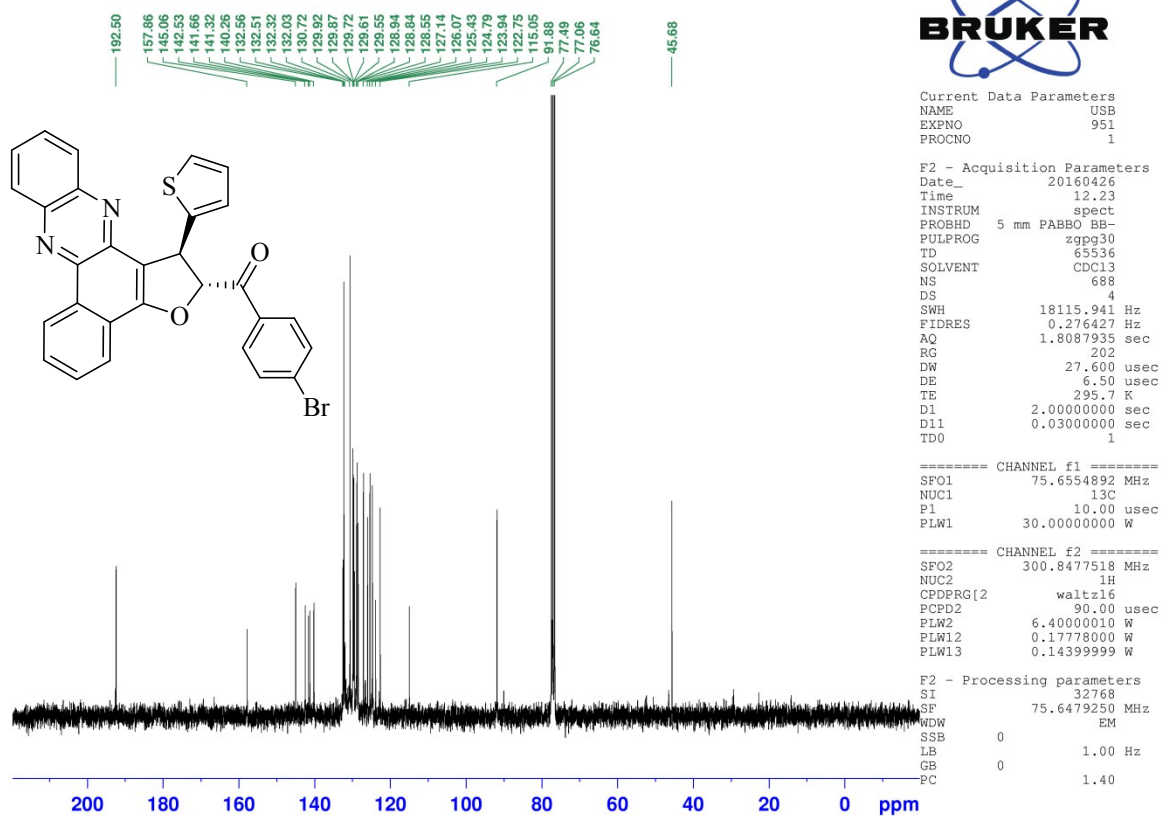

Figure 21:  $^{13}\text{C}$  NMR spectrum of compound 6f (75 MHz,  $\text{CDCl}_3$ ).

<sup>13</sup>C-Dr.maghsodlou- code 362 (yazdani)-

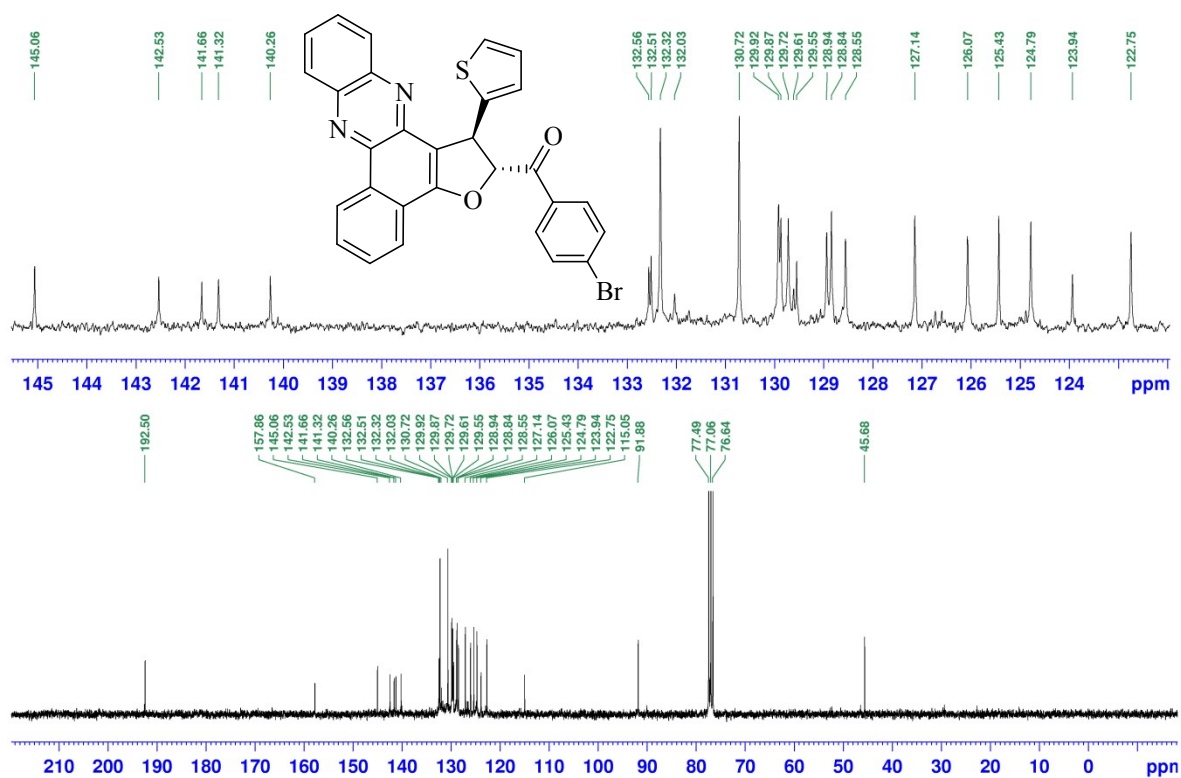

**Figure 22:** Expanded <sup>13</sup>C NMR spectrum of compound **6f** (75 MHz, CDCl<sub>3</sub>).

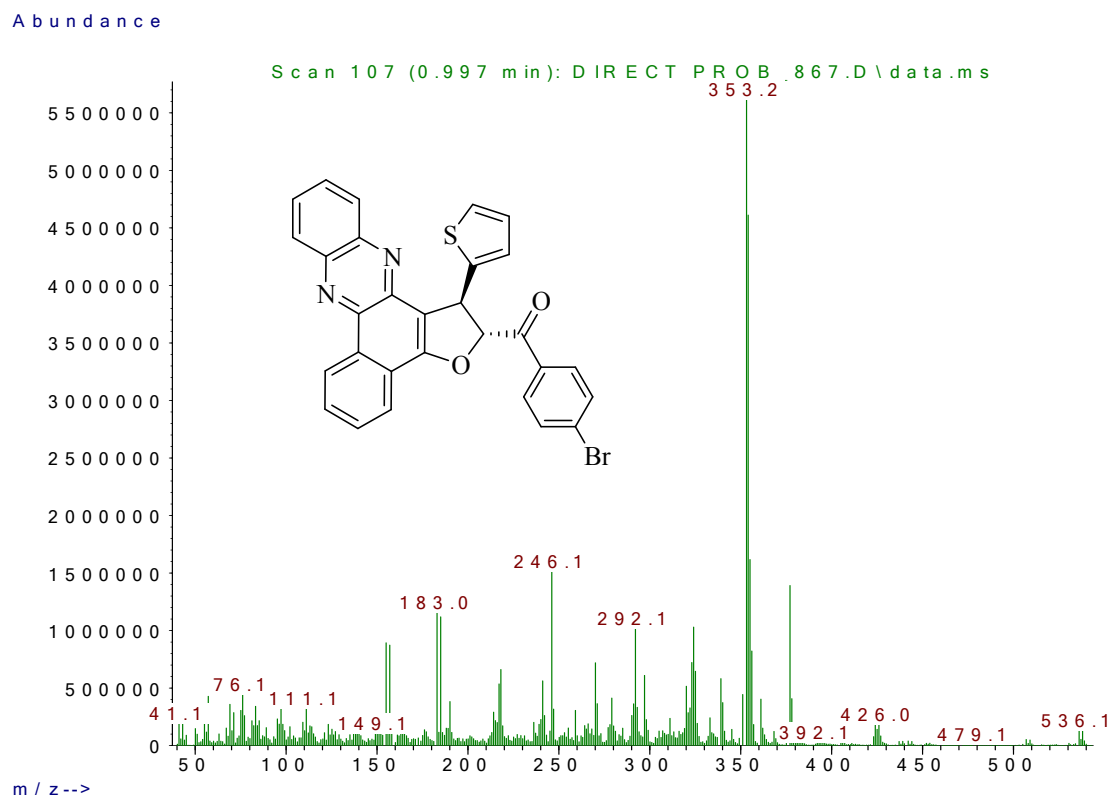

**Figure 23:** Mass spectrum of compound 6f.



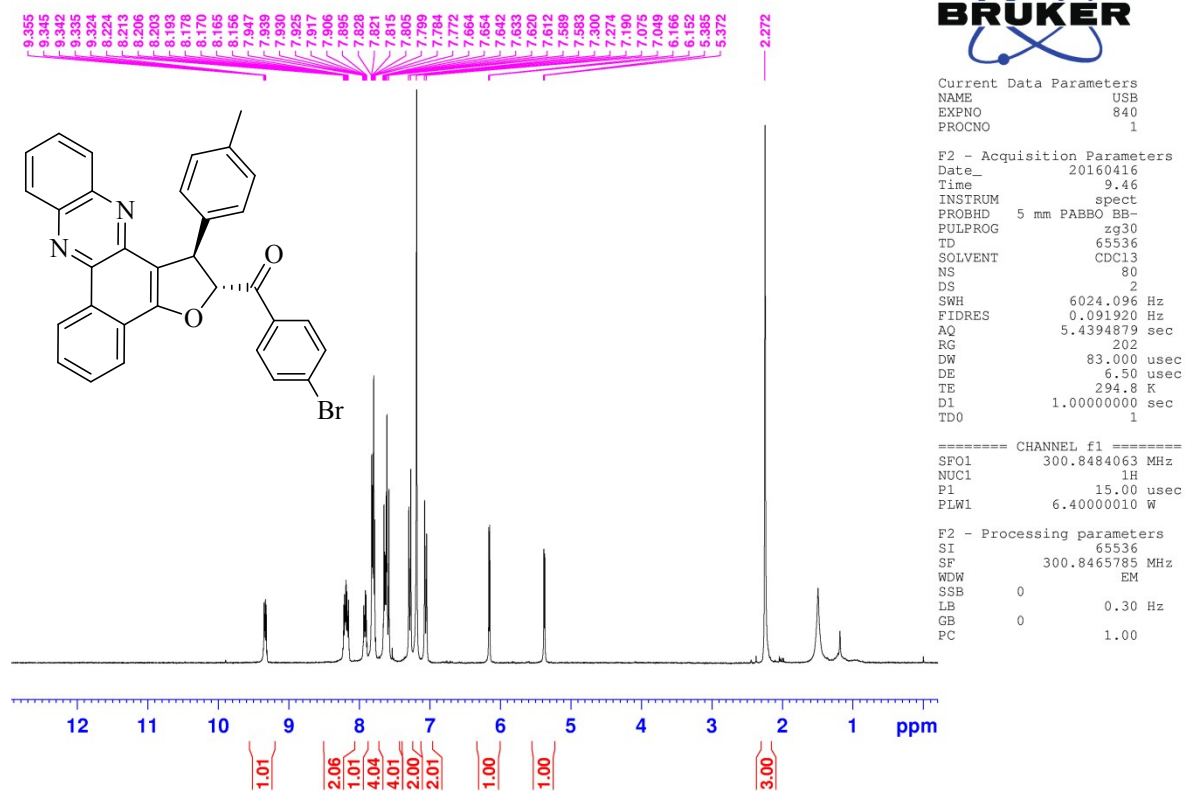

Figure 24: <sup>1</sup>H NMR spectrum of compound 6g (300 MHz, CDCl<sub>3</sub>).

C13- Dr.maghsoodlou- code 358 (yazdani)-

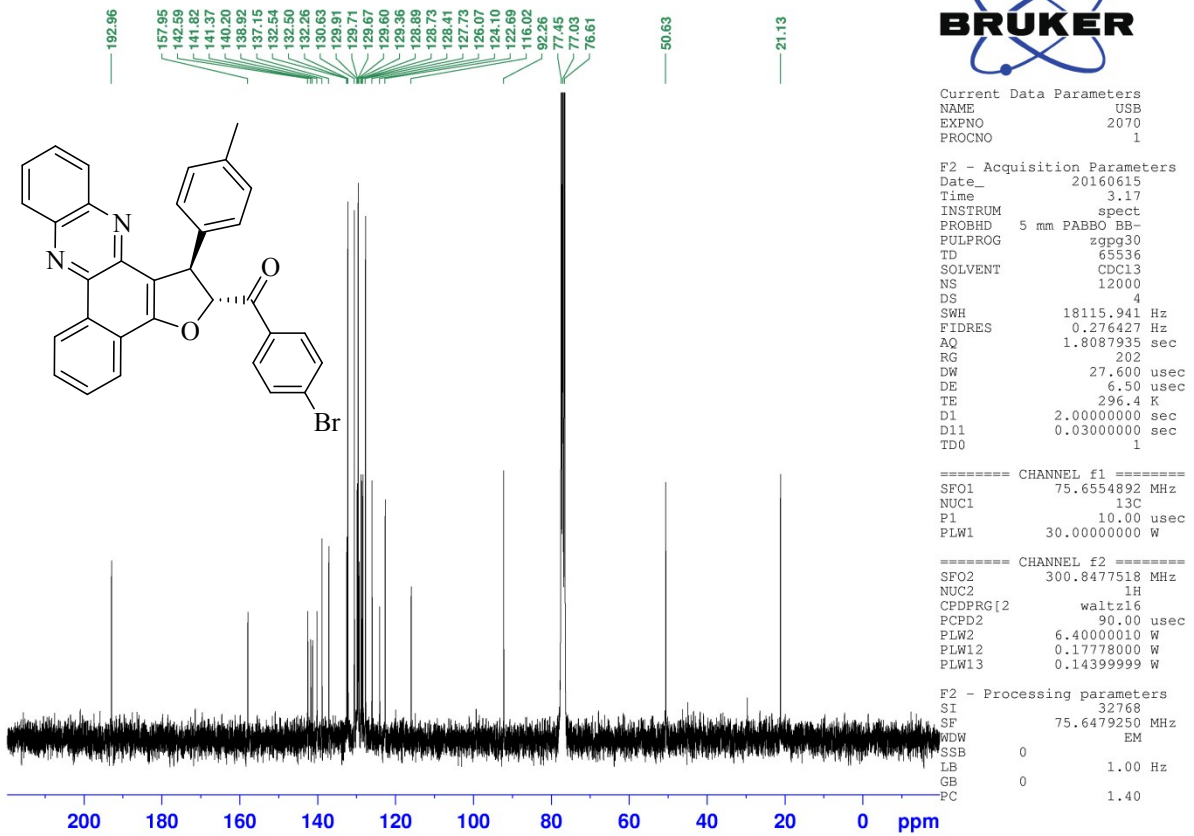

**Figure 25:**  $^{13}\text{C}$  NMR spectrum of compound **6g** (75 MHz,  $\text{CDCl}_3$ ).

C13- Dr.maghsodlou- code 358 (yazdani)-

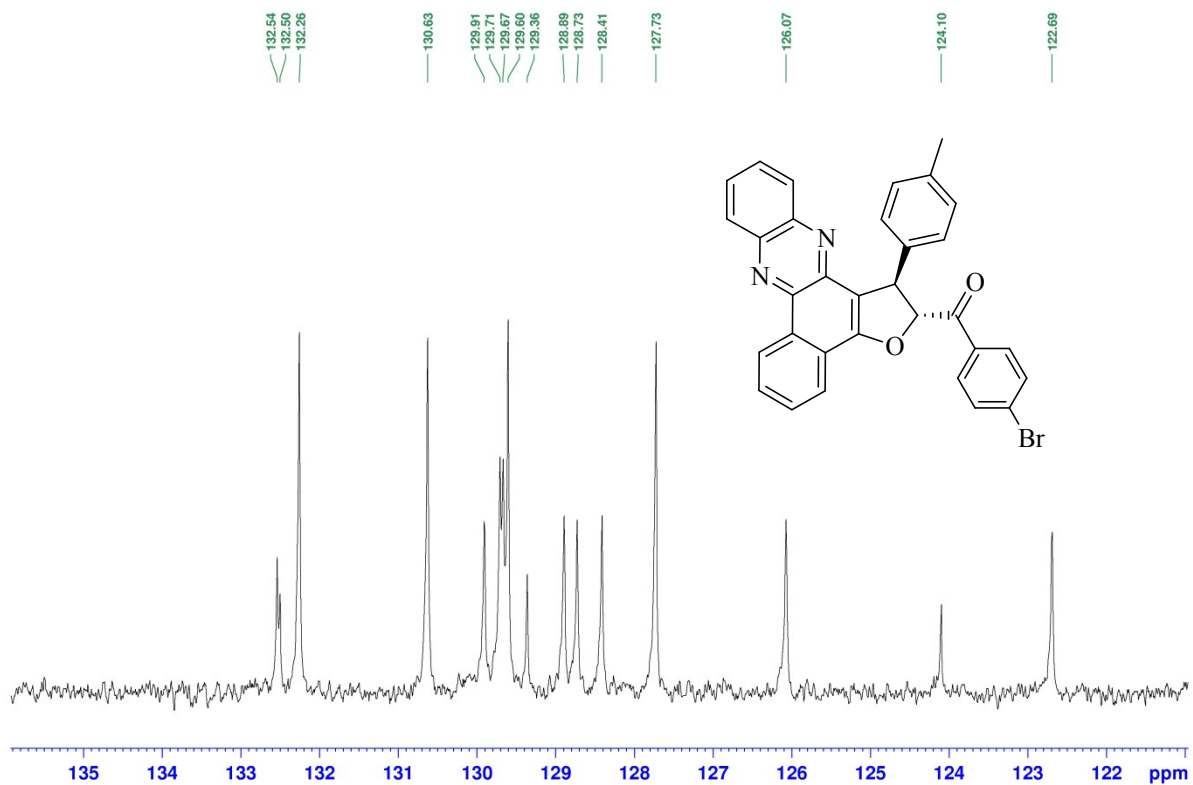

**Figure 26:** Expanded <sup>13</sup>C NMR spectrum of compound **6g** (75 MHz, CDCl<sub>3</sub>).

Abundance

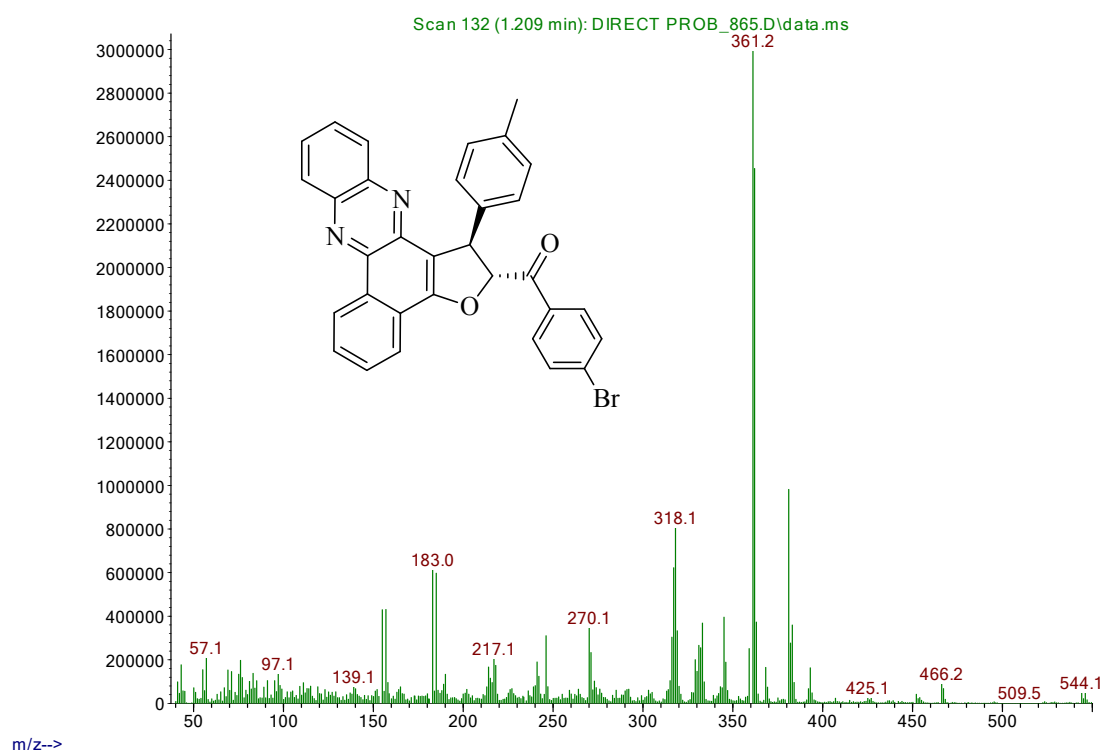

**Figure 27:** Mass spectrum of compound **6g**.

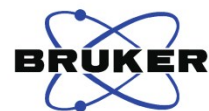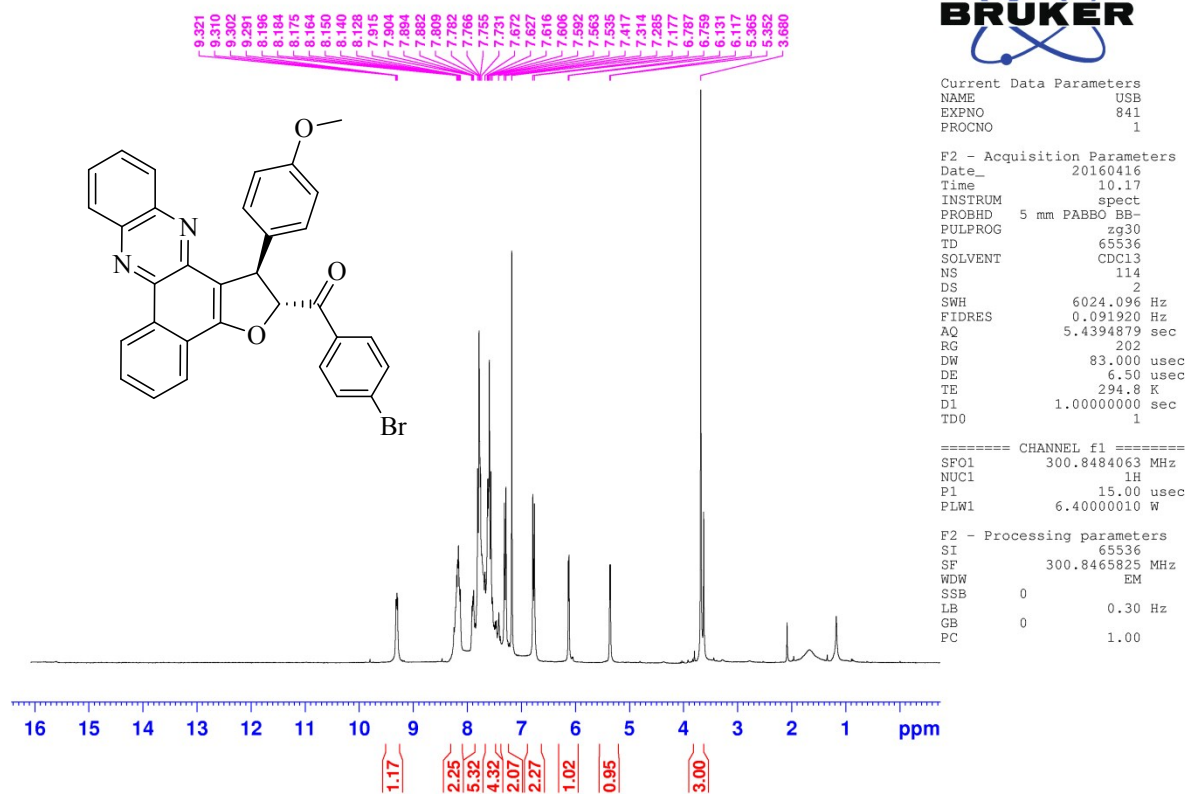

**Figure 28:**  $^1\text{H}$  NMR spectrum of compound **6h** (300 MHz,  $\text{CDCl}_3$ ).

13C-Dr.maghsodlou- code 359(yazdani)-

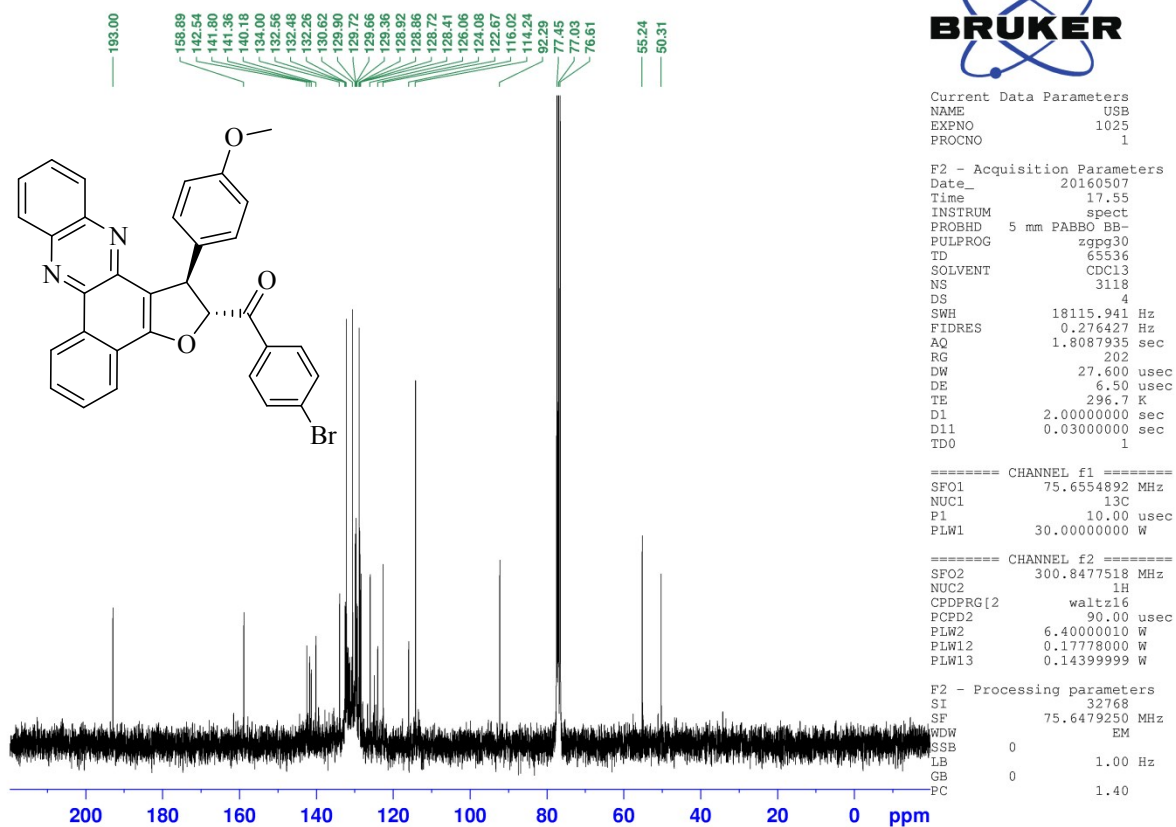

Figure 29:  $^{13}\text{C}$  NMR spectrum of compound 6h (75 MHz,  $\text{CDCl}_3$ ).

13C-Dr.maghsodlou- code 359 (yazdani) -

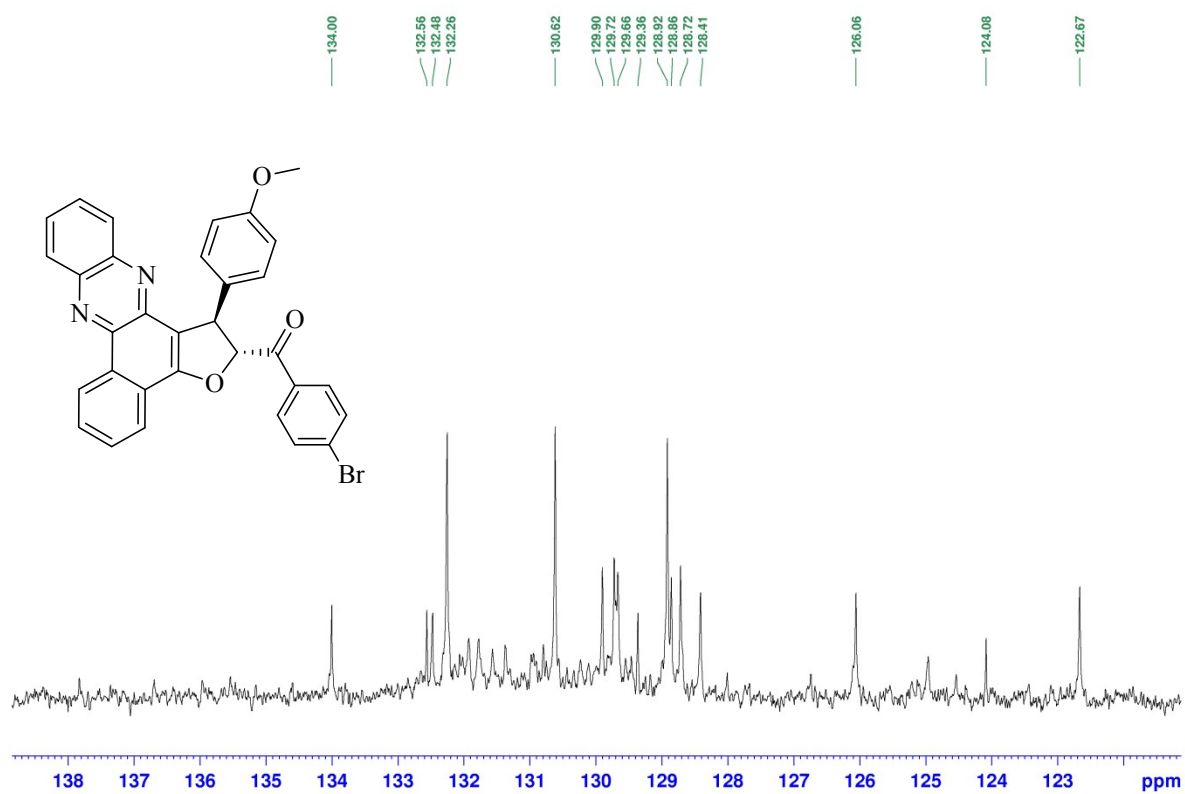

**Figure 30:** Expanded <sup>13</sup>C NMR spectrum of compound **6h** (75 MHz, CDCl<sub>3</sub>).

Abundance

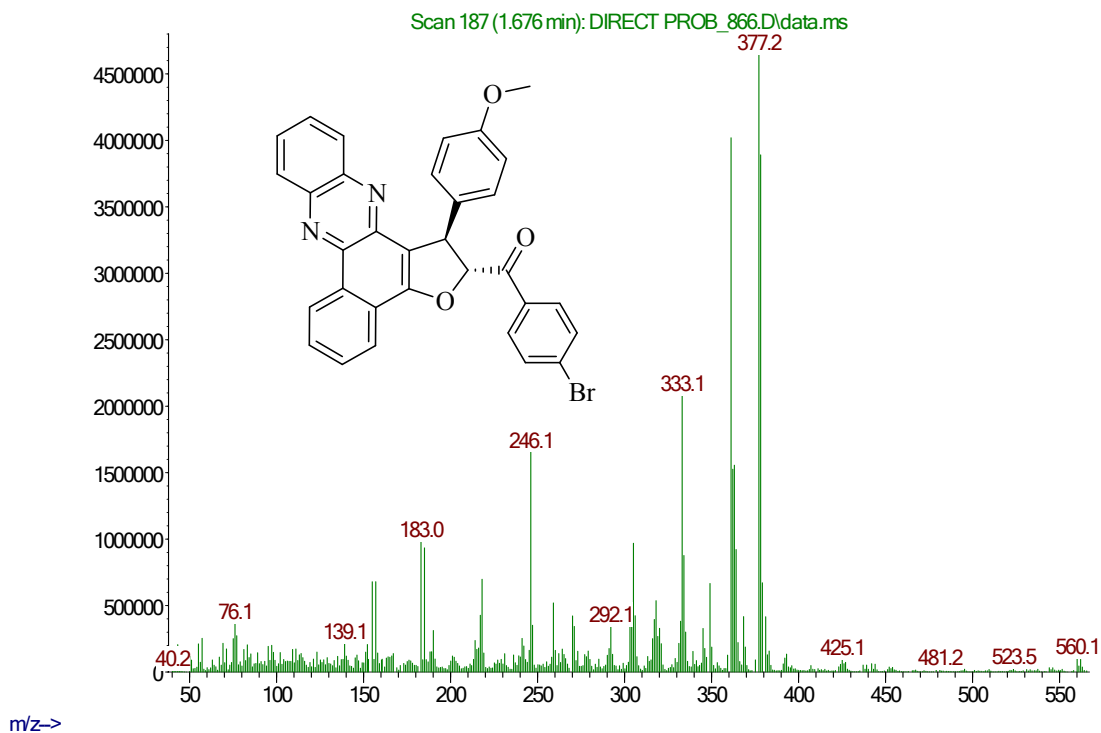

**Figure 31:** Mass spectrum of compound **6h**.



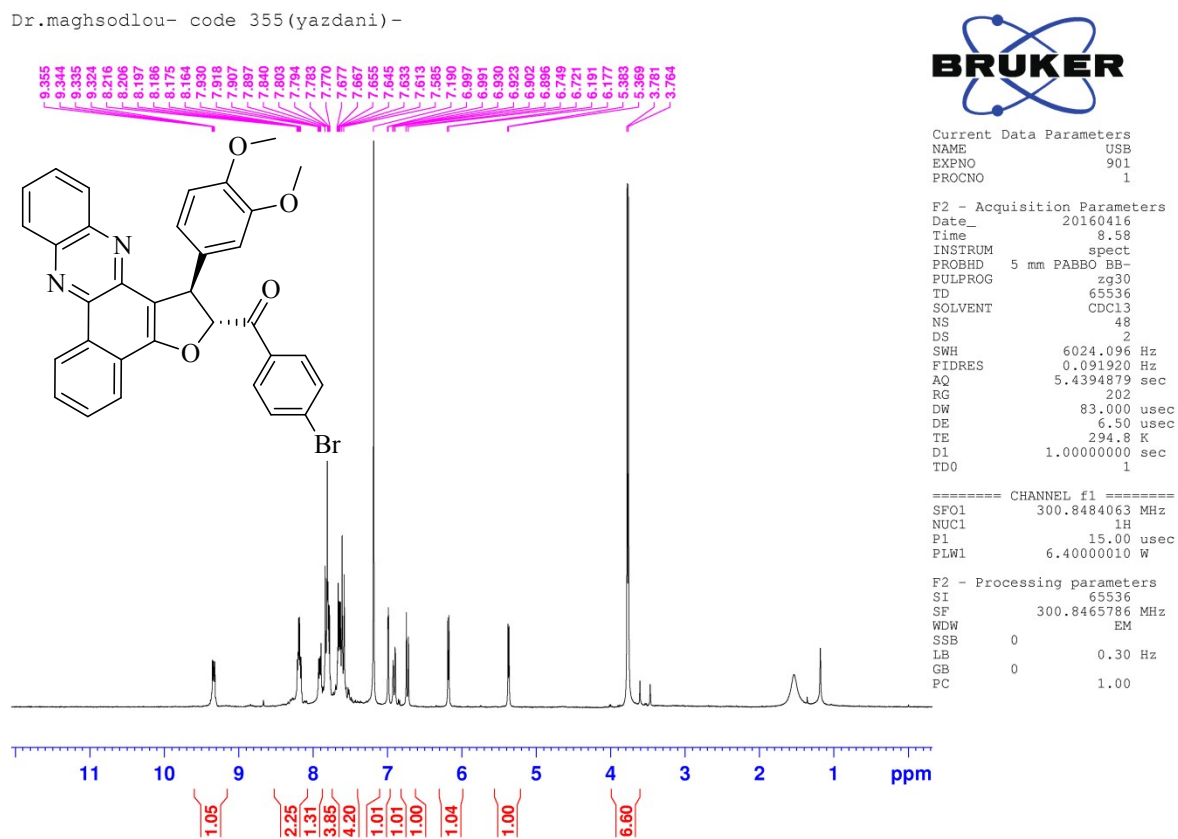

**Figure 32:**  $^1\text{H}$  NMR spectrum of compound **6i** (300 MHz,  $\text{CDCl}_3$ ).

13C-Dr.magnsodlou- code 355 (yazdani)-

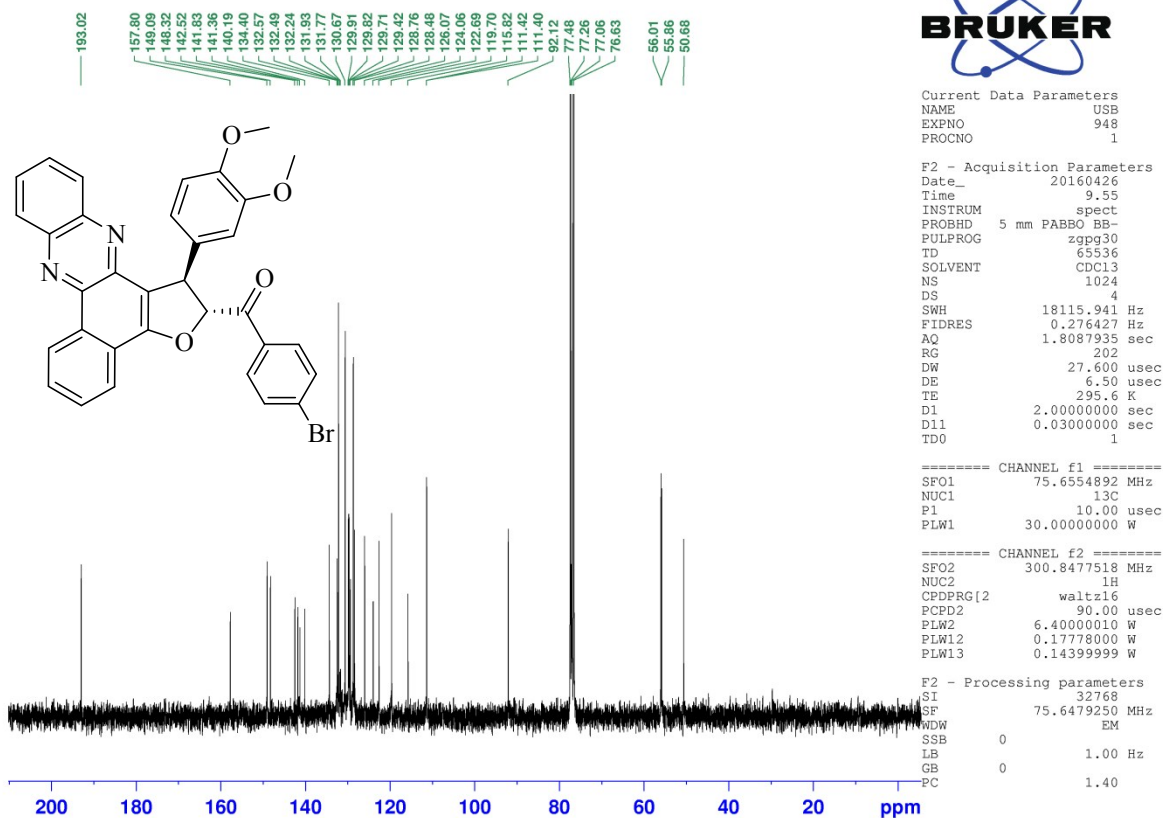

Figure 33:  $^{13}\text{C}$  NMR spectrum of compound **6i** (75 MHz,  $\text{CDCl}_3$ ).

13C-Dr.maghsodlou- code 355 (yazdani)-

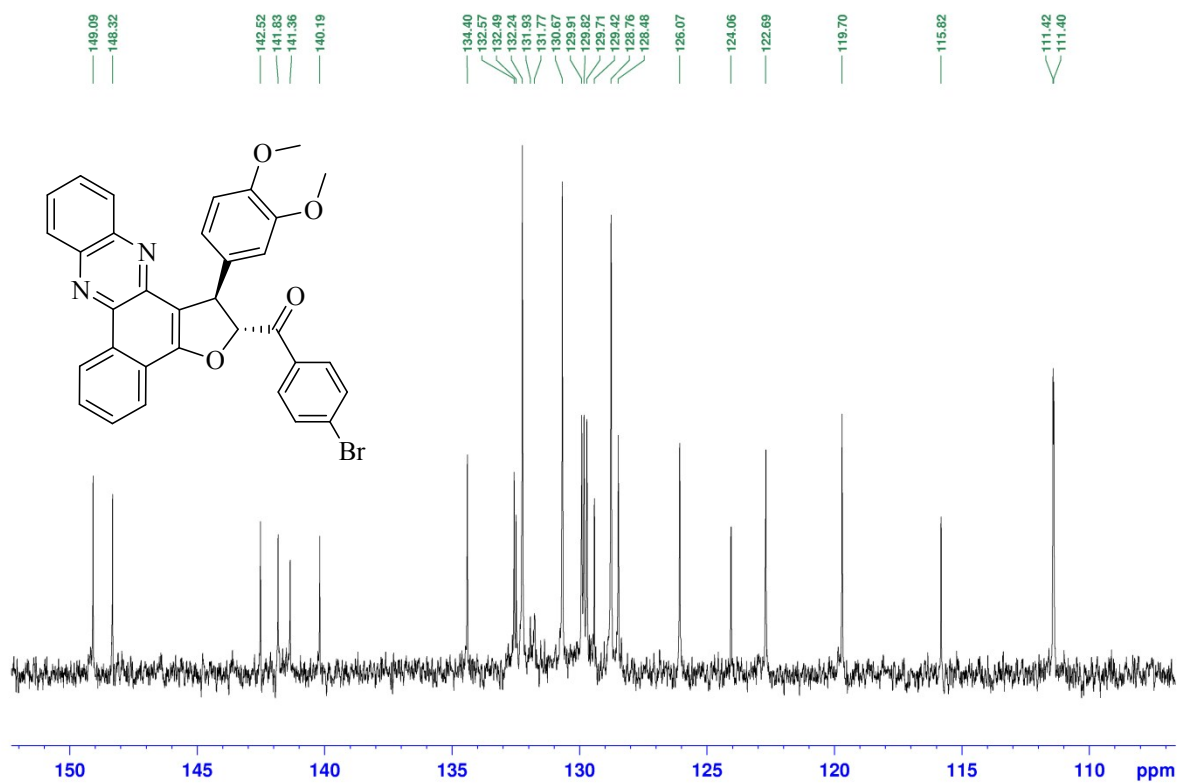

**Figure 34:** Expanded  $^{13}\text{C}$  NMR spectrum of compound **6i** (75 MHz,  $\text{CDCl}_3$ ).

Abundance

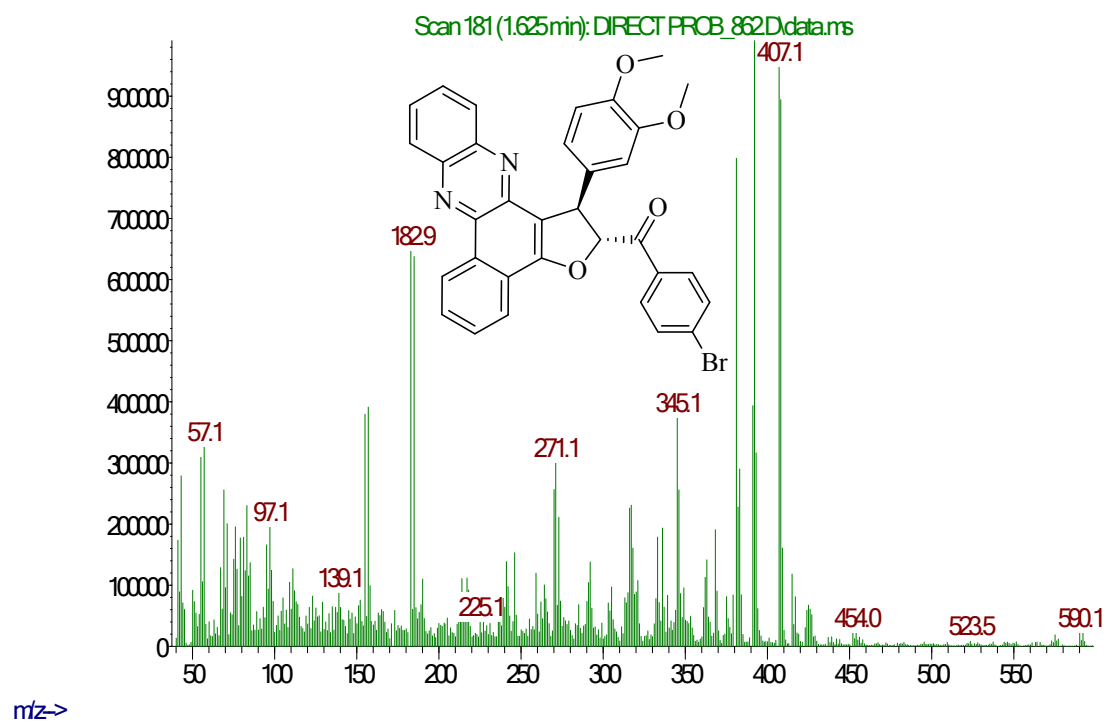

Figure 35: Mass spectrum of compound 6i.

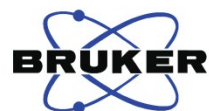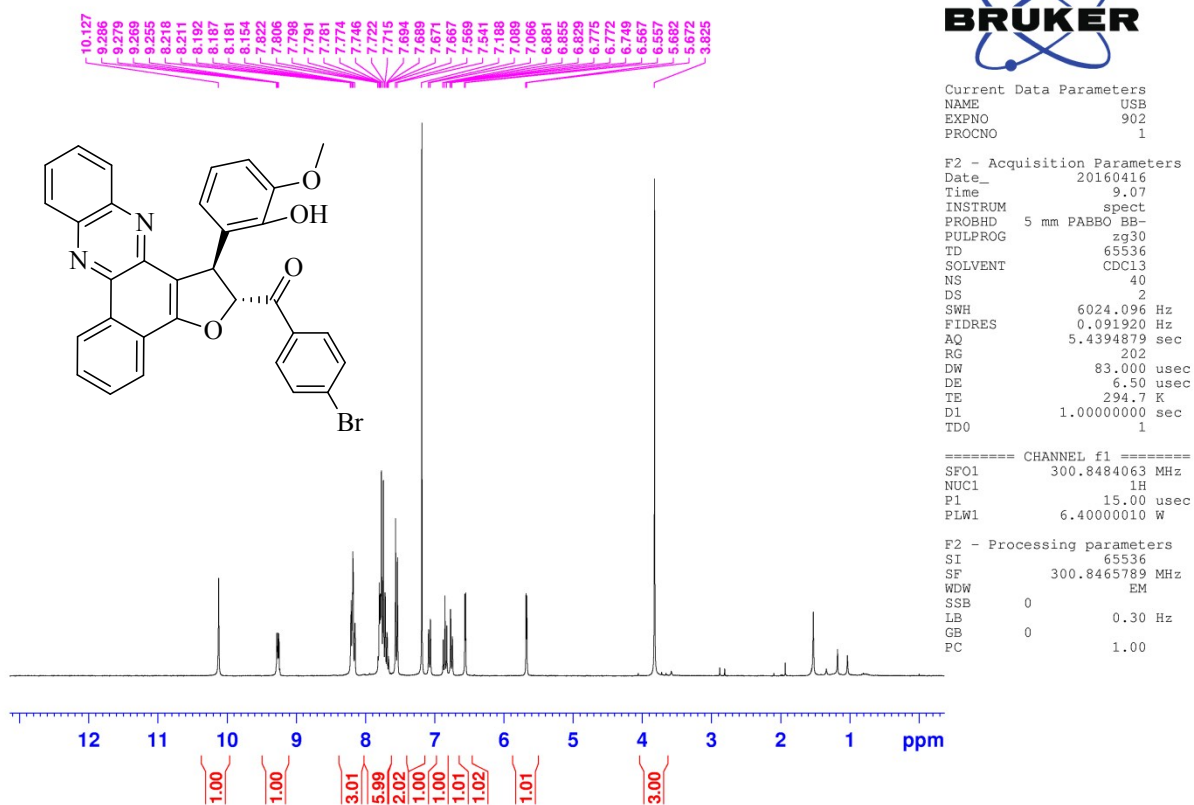

Figure 36: <sup>1</sup>H NMR spectrum of compound **6j** (300 MHz, CDCl<sub>3</sub>).

C13CPD- Yazdani- code 356-REPEAT

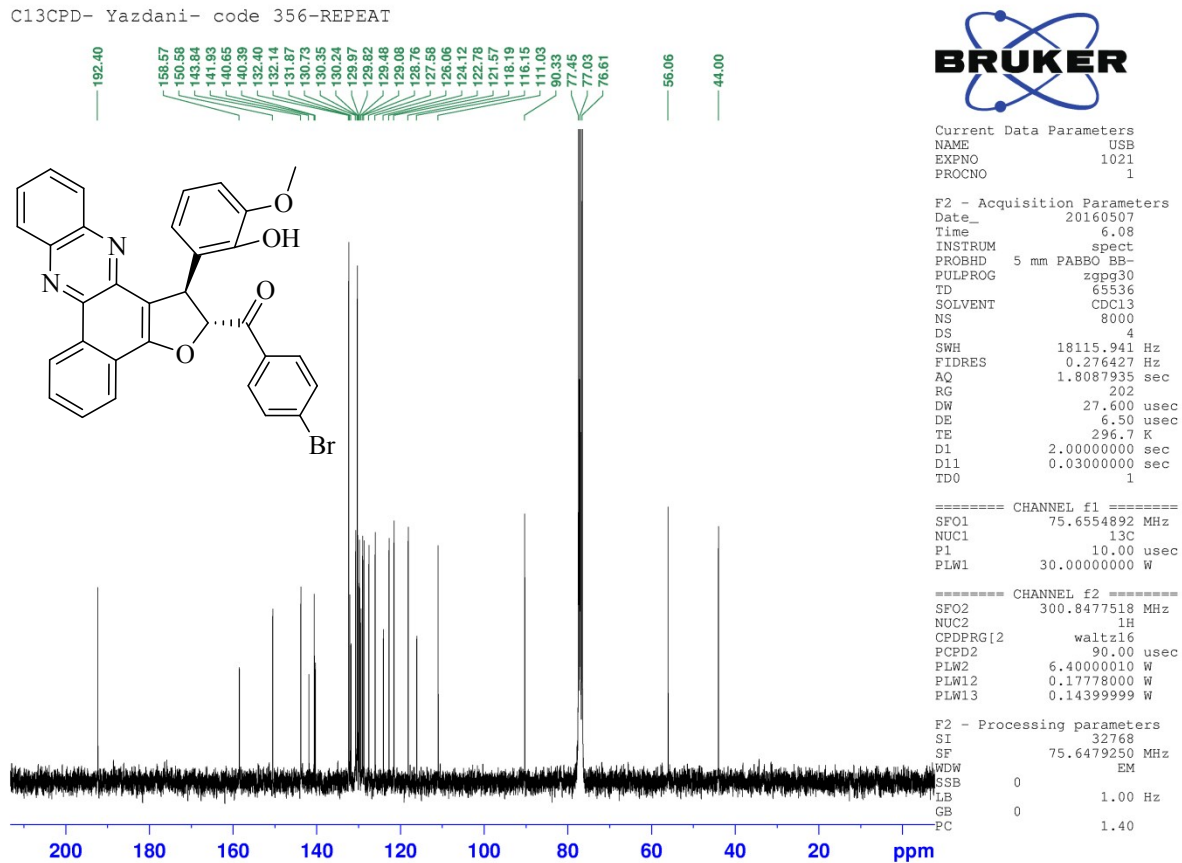

Figure 37:  $^{13}\text{C}$  NMR spectrum of compound **6j** (75 MHz,  $\text{CDCl}_3$ ).

C13CPD- Yazdani- code 356-REPEAT

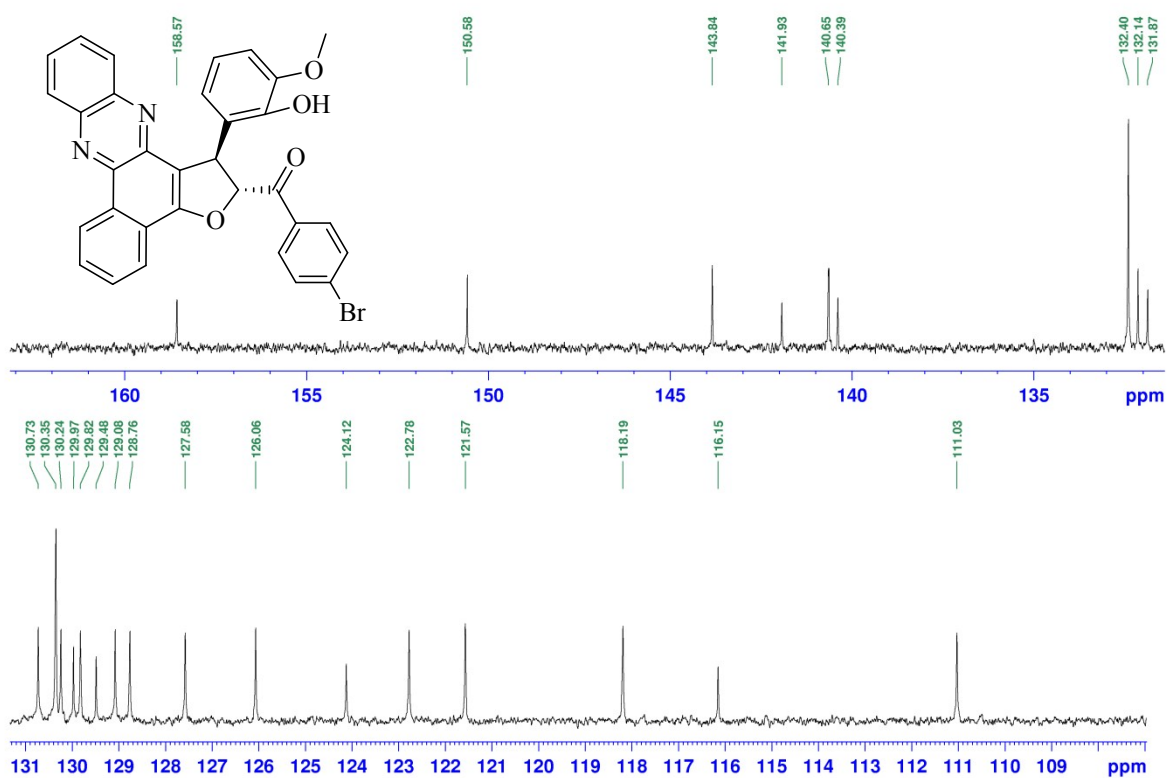

**Figure 38:** Expanded  $^{13}\text{C}$  NMR spectrum of compound **6j** (75 MHz,  $\text{CDCl}_3$ ).

Abundance

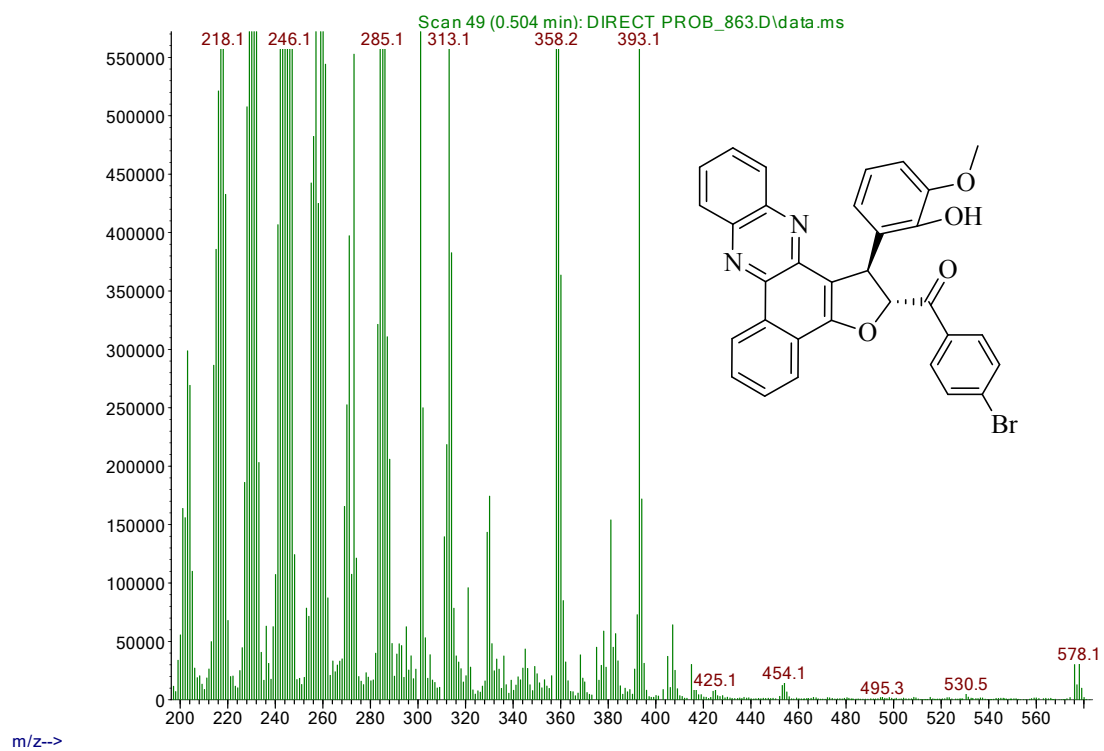

**Figure 39:** Mass spectrum of compound **6j**.



Dr.maghsodlou- code 364(yazdani)-

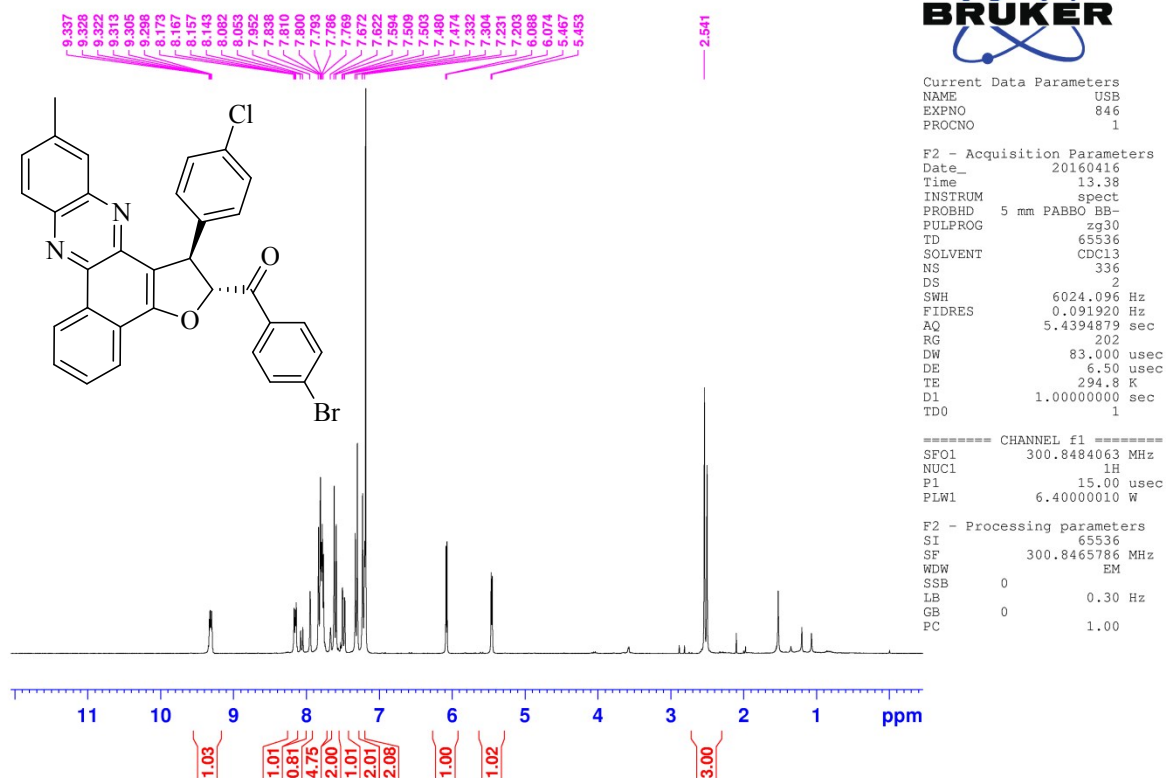

**Figure 40:**  $^1\text{H}$  NMR spectrum of compound **6k** (300 MHz,  $\text{CDCl}_3$ ).

C13CPD- Yazdani code 364-

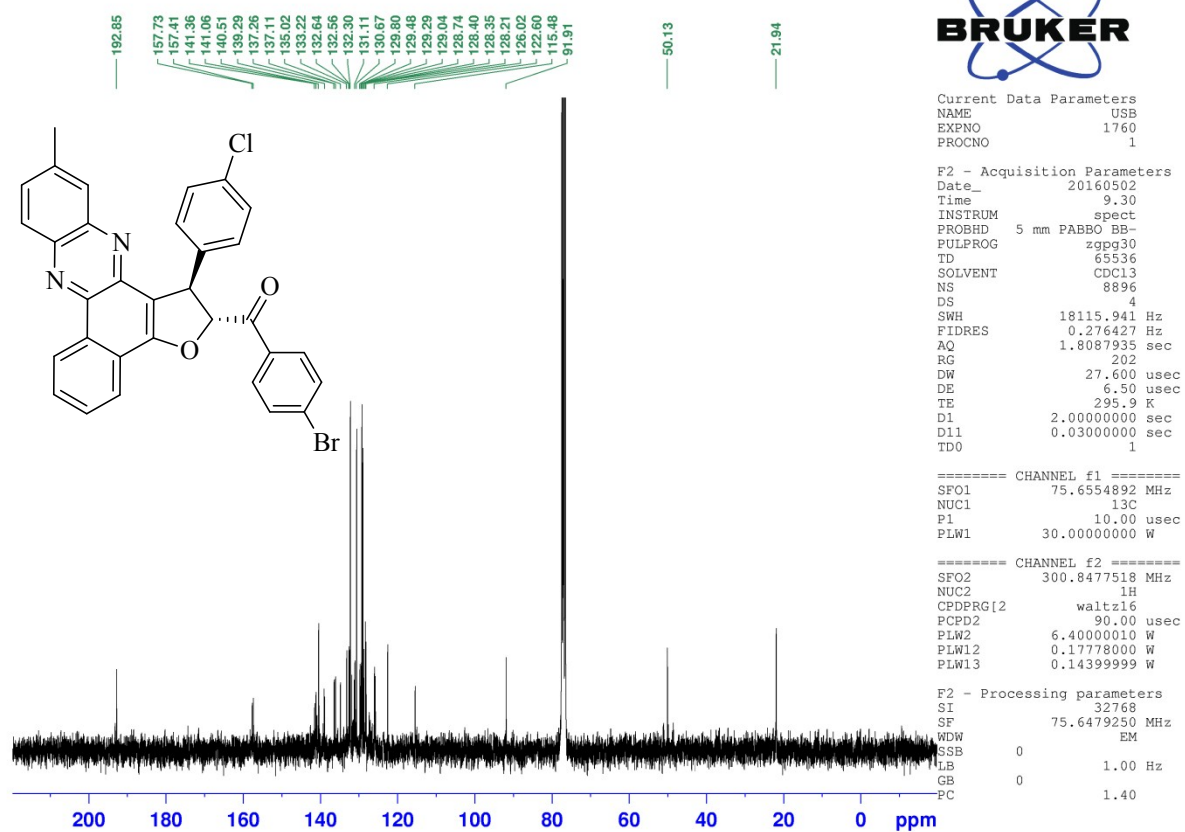

Figure 41: <sup>13</sup>C NMR spectrum of compound 6k (75 MHz, CDCl<sub>3</sub>).

C13CPD- Yazdani code 364-

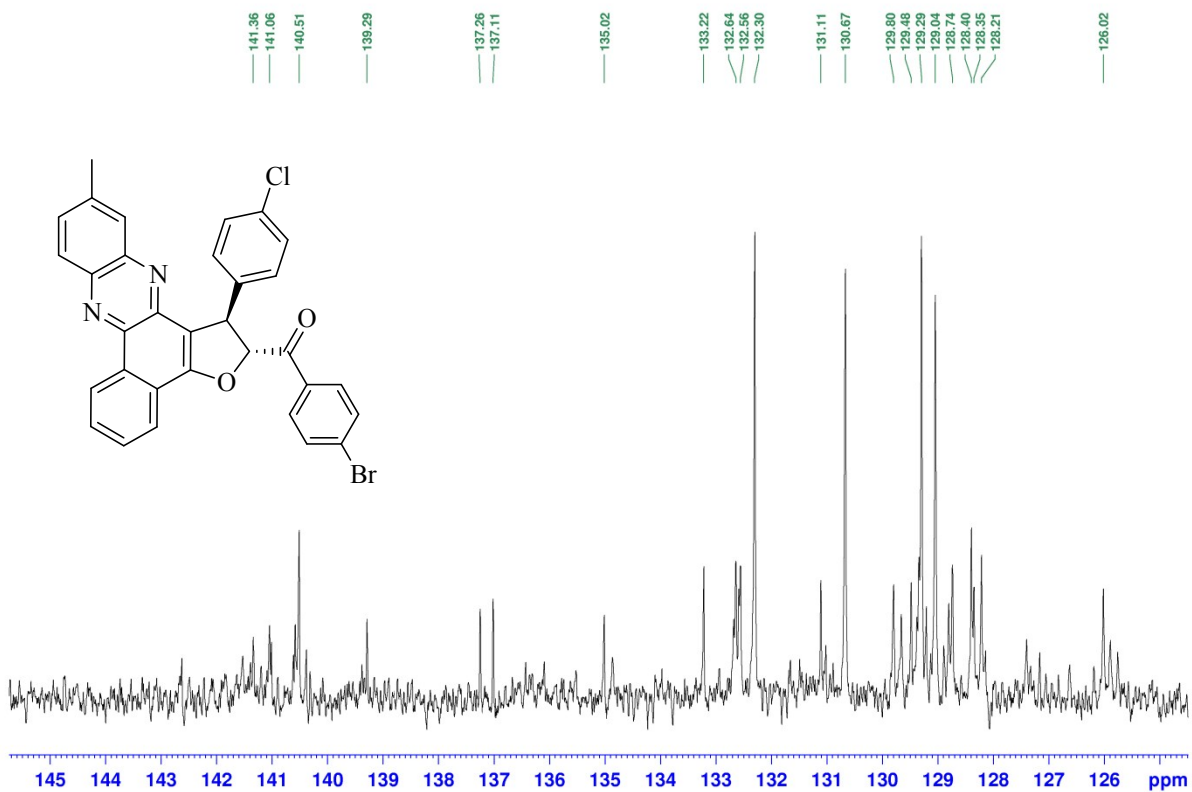

**Figure 42:** Expanded <sup>13</sup>C NMR spectrum of compound **6k** (75 MHz, CDCl<sub>3</sub>).

Abundance

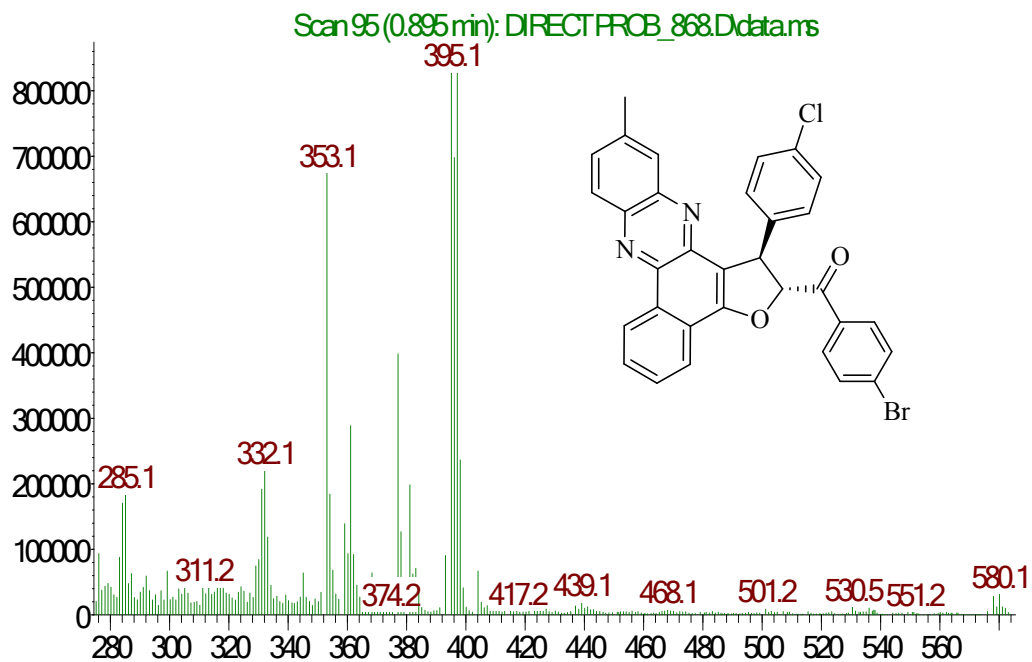

m/z→

Figure 43: Mass spectrum of compound 6k.

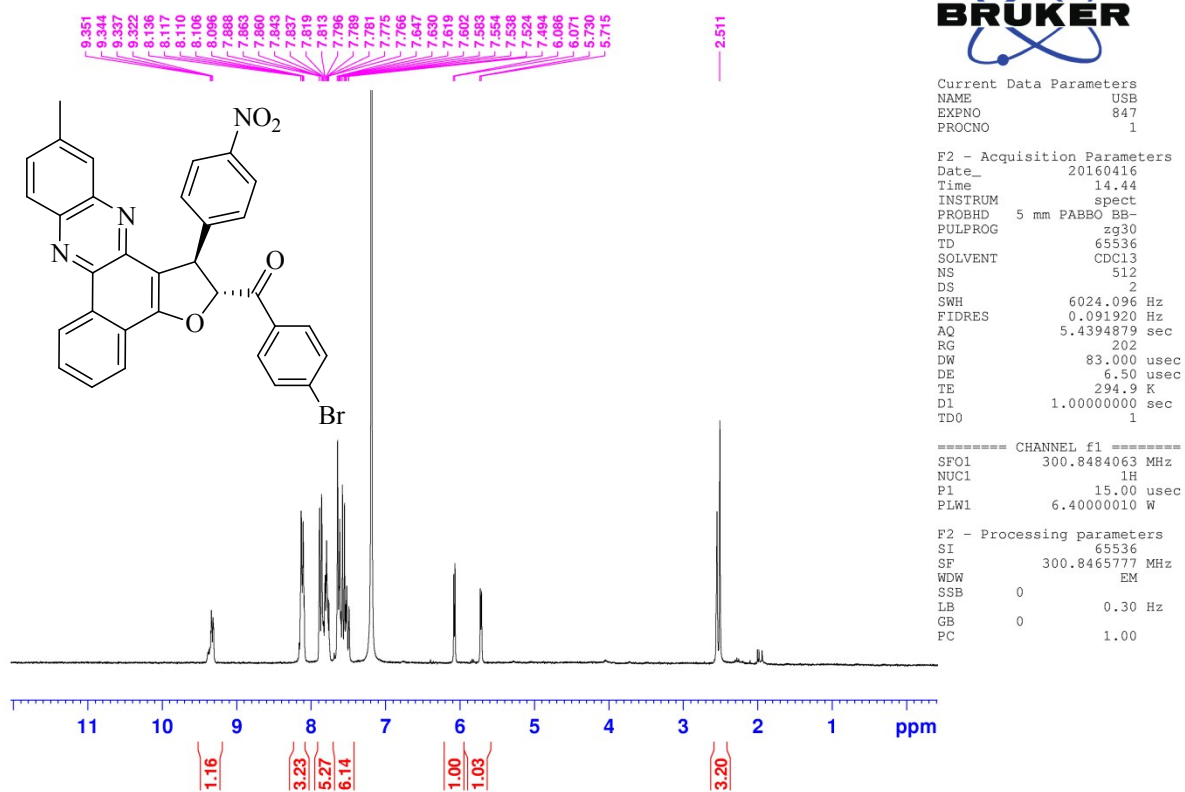

**Figure 44:** <sup>1</sup>H NMR spectrum of compound **6l** (300 MHz, CDCl<sub>3</sub>).

C13CPD- Yazdani code 365-

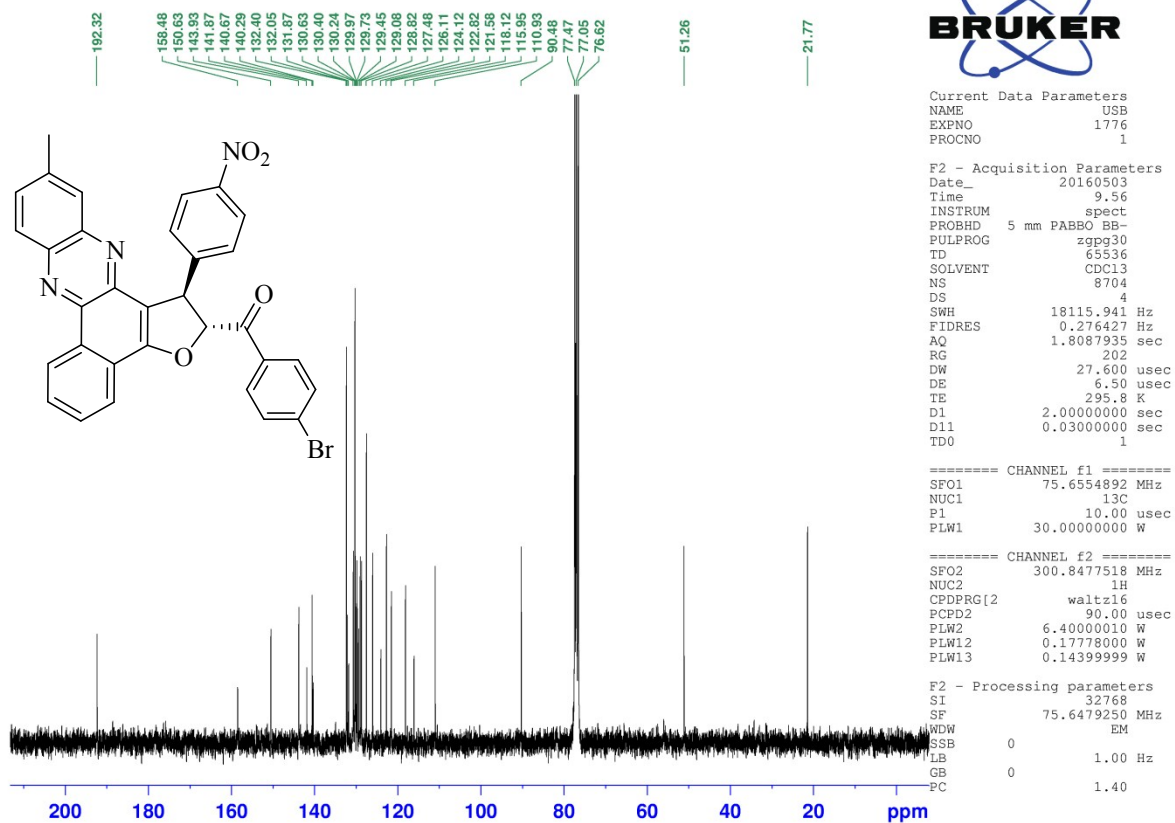

**Figure 45:**  $^{13}\text{C}$  NMR spectrum of compound **6l** (75 MHz,  $\text{CDCl}_3$ ).

Abundance

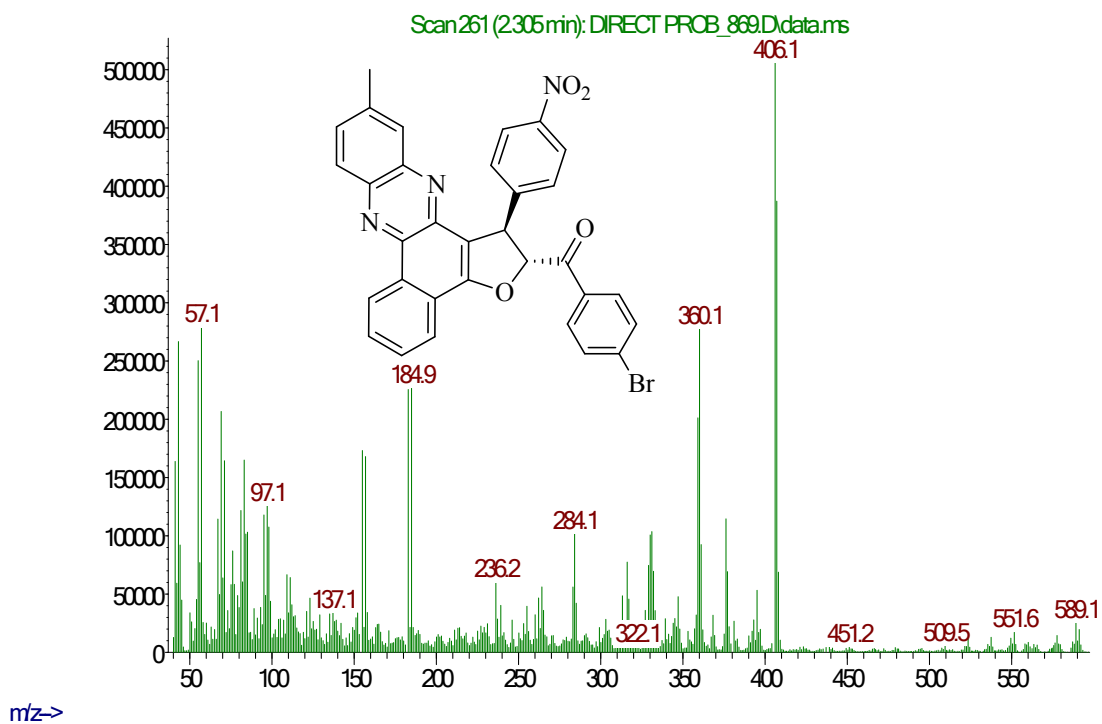

**Figure 46:** Mass spectrum of compound **61**.

Dr.maghsodlou- code 366(yazdani)-

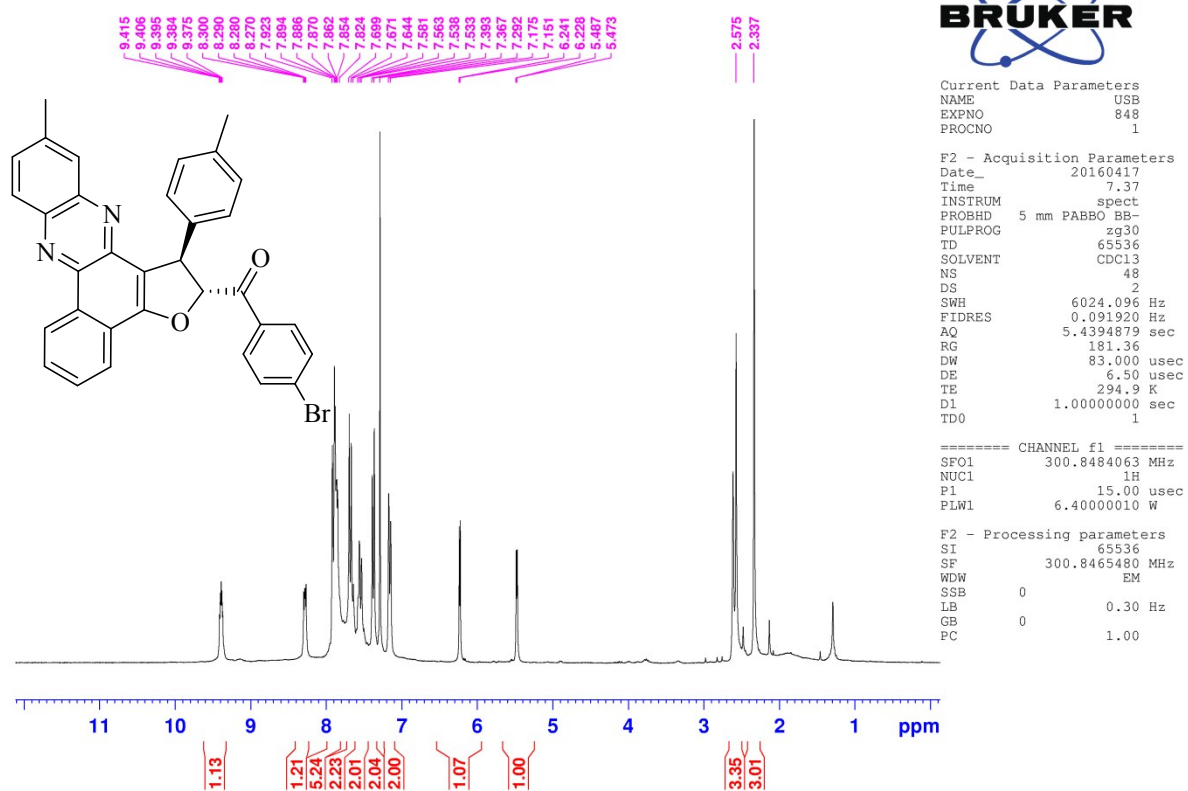

Figure 47:  $^1\text{H}$  NMR spectrum of compound **6m** (300 MHz,  $\text{CDCl}_3$ ).



13C-Dr.magnsodlou- code 366 (yazdani) -

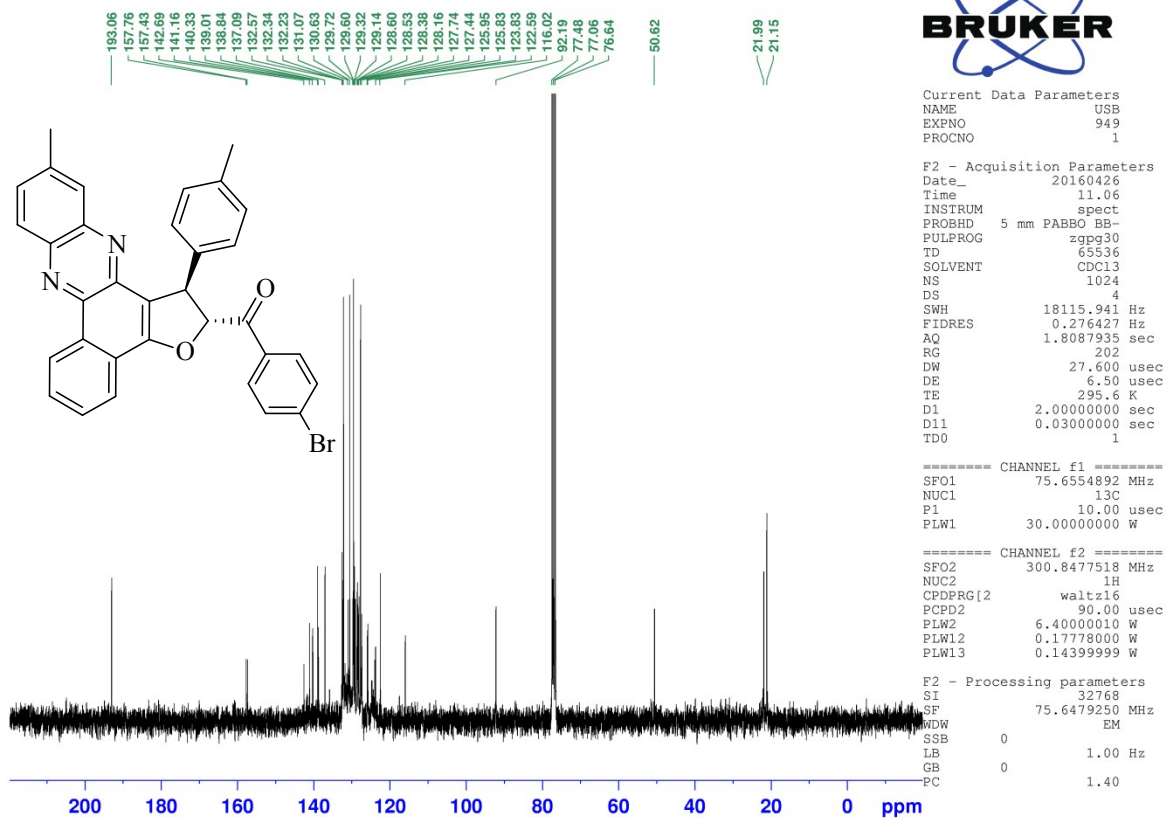

**Figure 48:**  $^{13}\text{C}$  NMR spectrum of compound **6m** (75 MHz,  $\text{CDCl}_3$ ).

<sup>13</sup>C-Dr.maghsoodlou- code 366 (yazdani)-

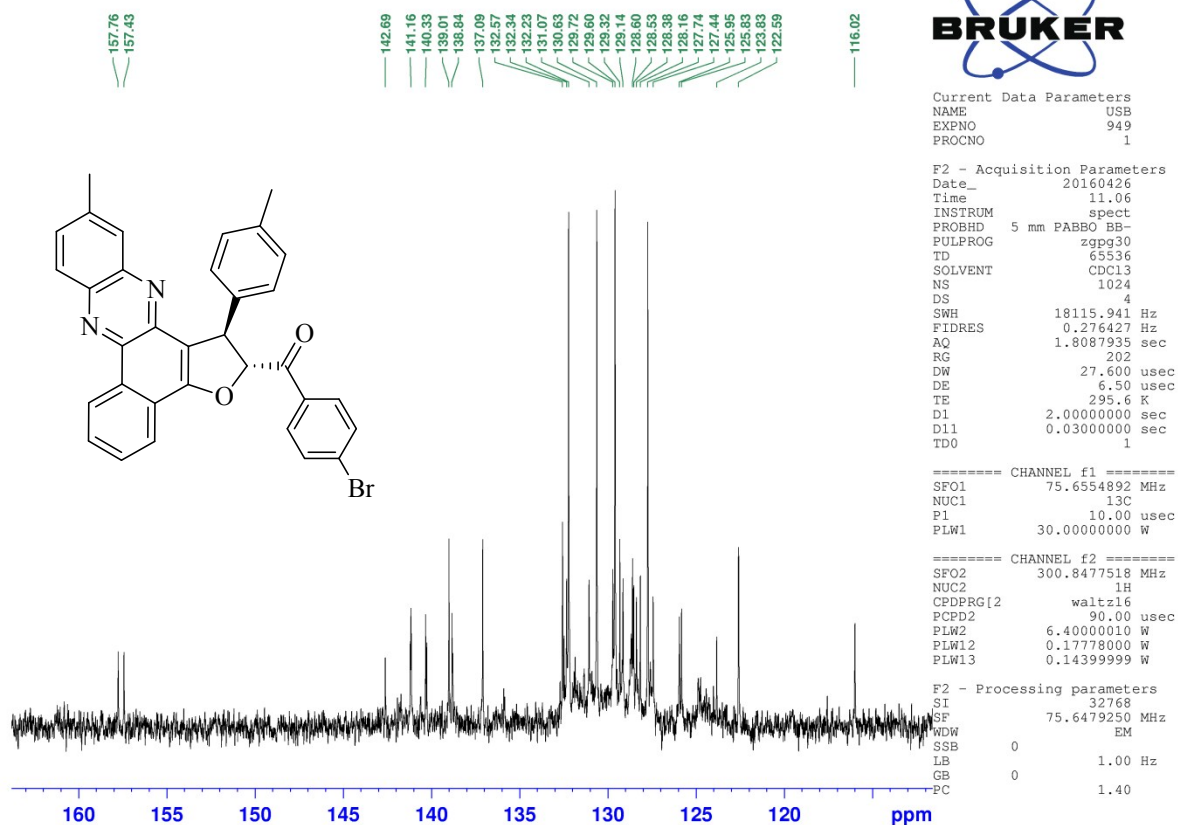

**Figure 49:** Expanded <sup>13</sup>C NMR spectrum of compound **6m** (75 MHz, CDCl<sub>3</sub>).

Abundance

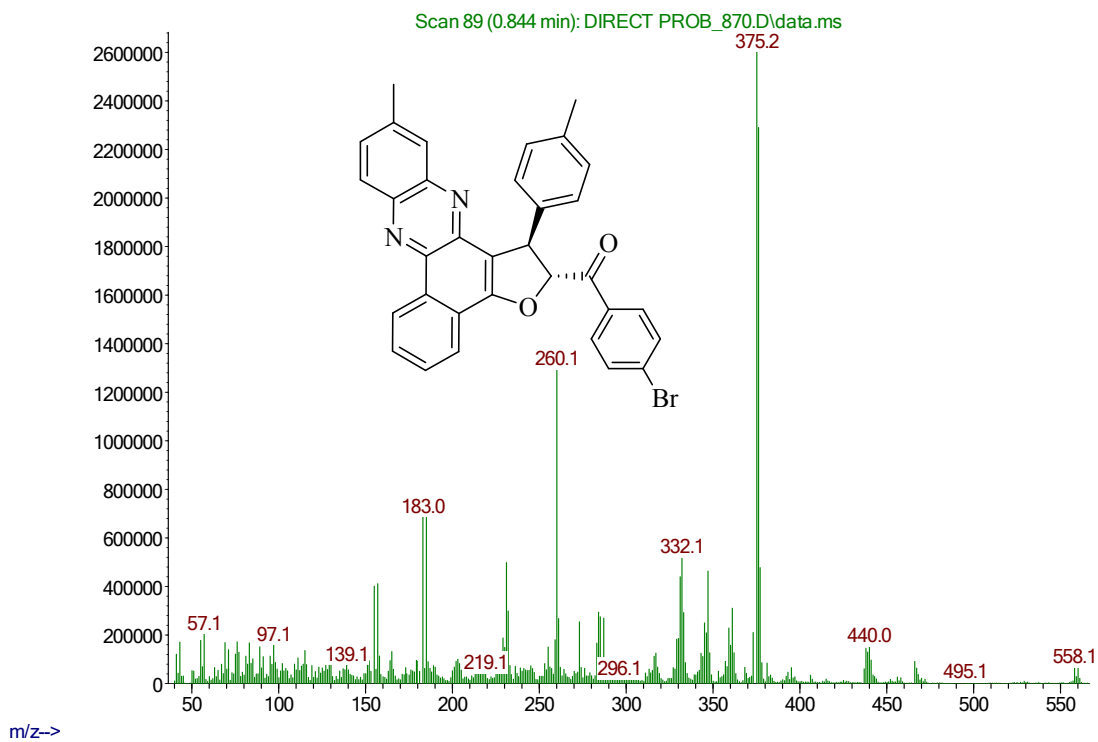

**Figure 50:** Mass spectrum of compound **6m**.

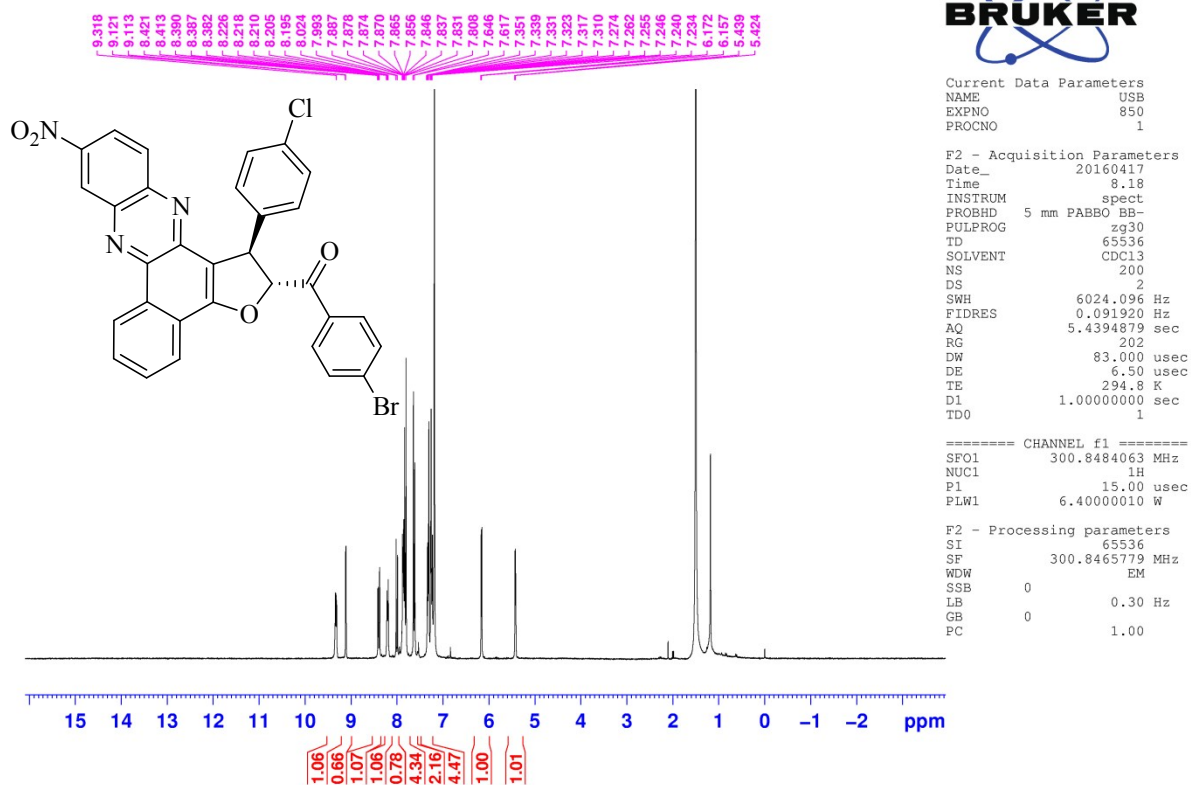

Figure 51:  $^1\text{H}$  NMR spectrum of compound 6n (300 MHz,  $\text{CDCl}_3$ ).

C13CPD- Yazdani- code 368

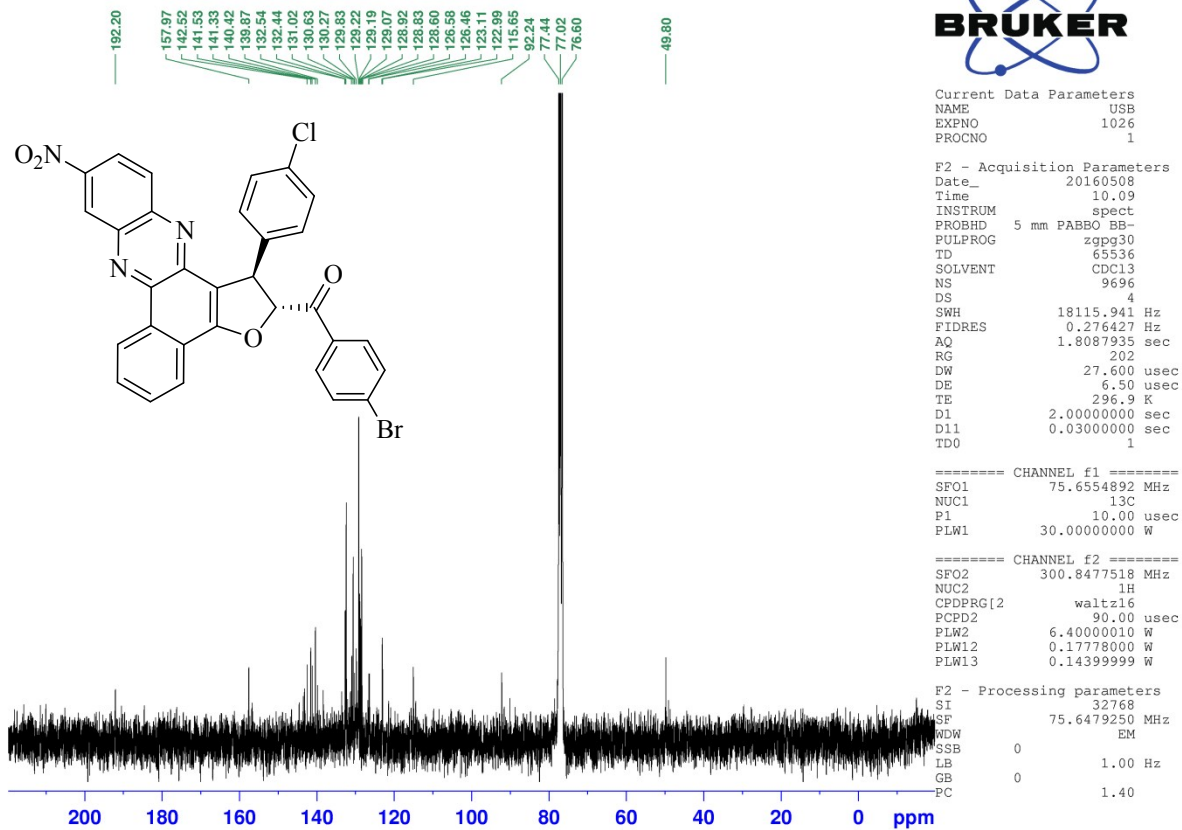

Figure 52:  $^{13}\text{C}$  NMR spectrum of compound **6n** (75 MHz,  $\text{CDCl}_3$ ).

Abundance

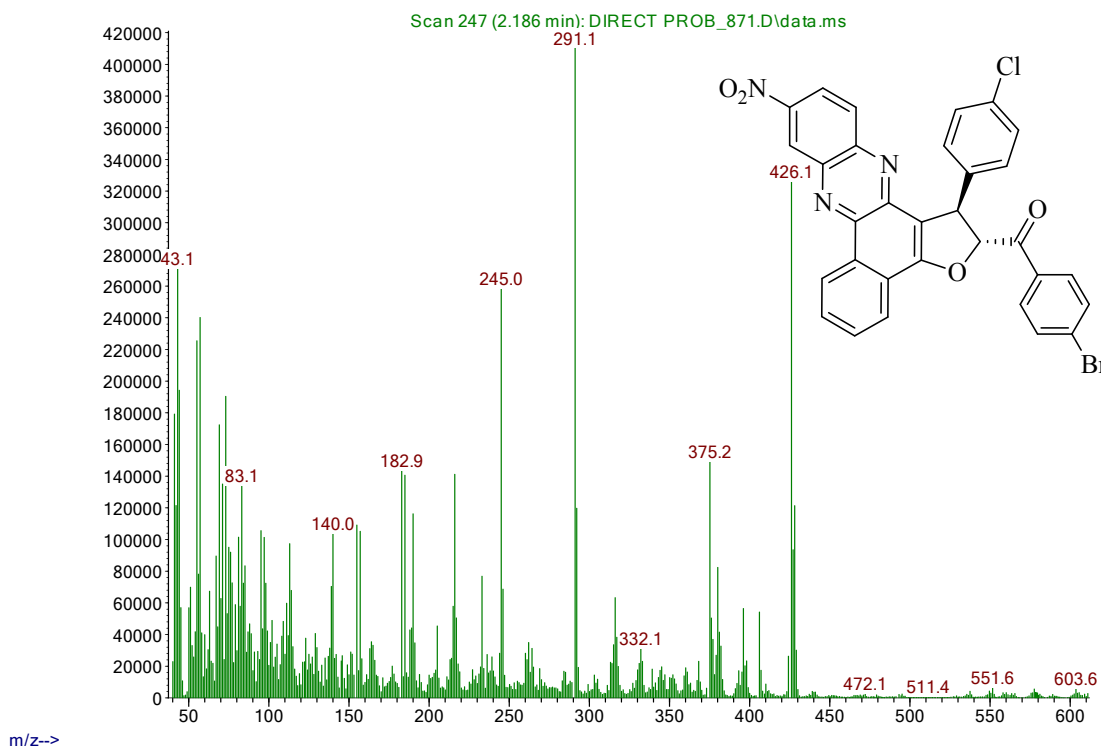

**Figure 53:** Mass spectrum of compound 6n.

Dr.maghsodlou- code 369(yazdani)-

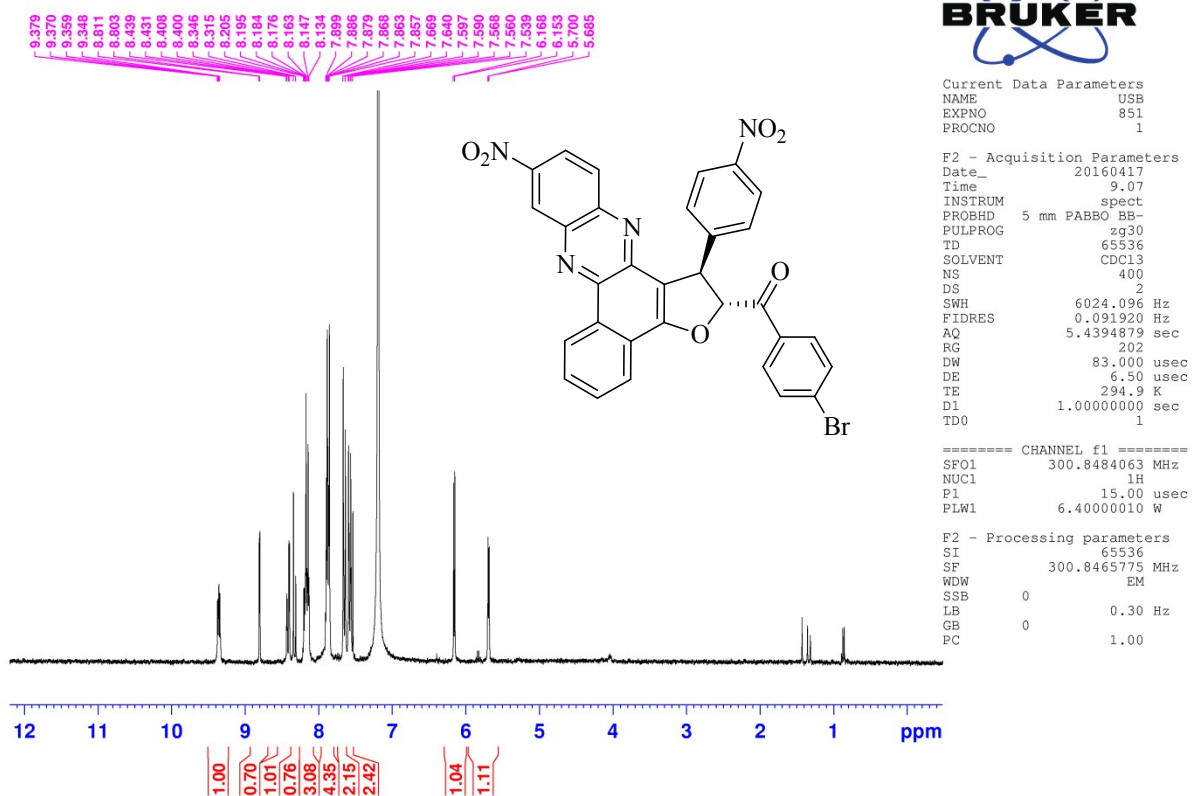

**Figure 54:**  $^1\text{H}$  NMR spectrum of compound **6o** (300 MHz,  $\text{CDCl}_3$ ).

13C- Yazdani - code 369-

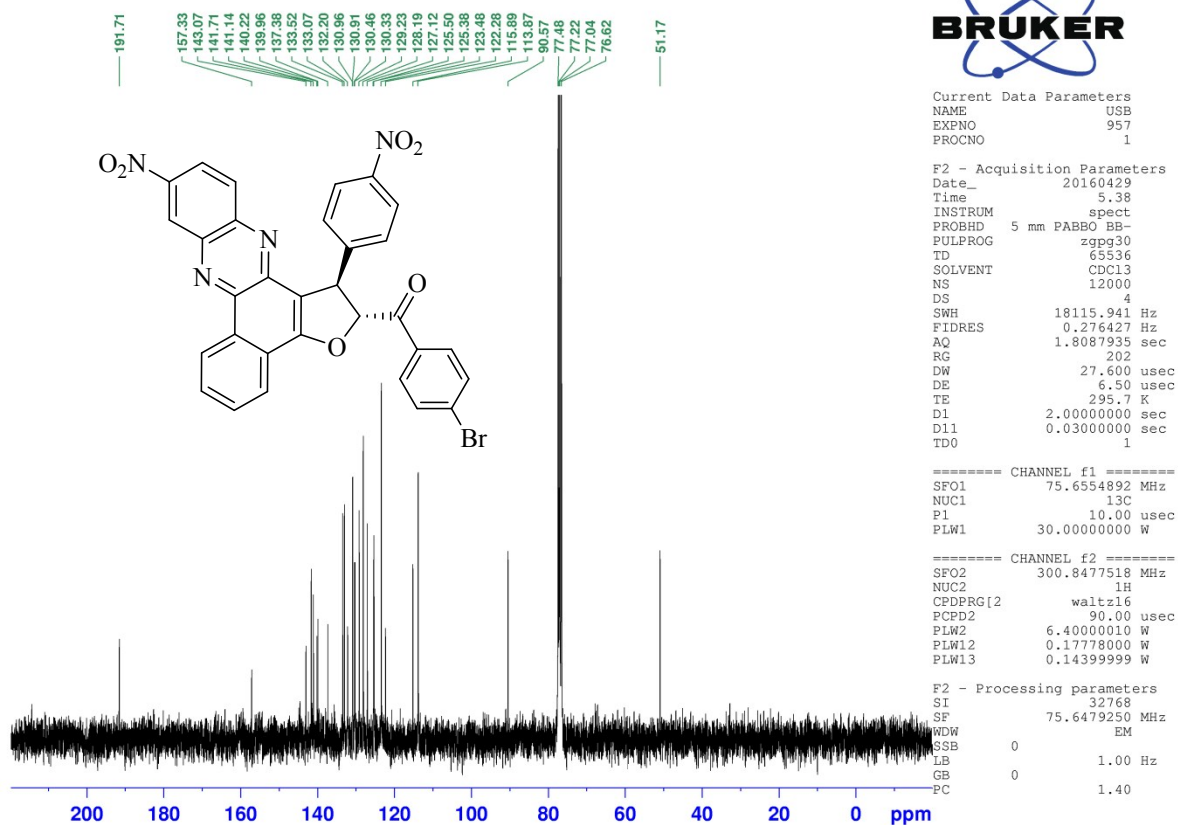

Figure 55:  $^{13}\text{C}$  NMR spectrum of compound 60 (75 MHz,  $\text{CDCl}_3$ ).



Abundance

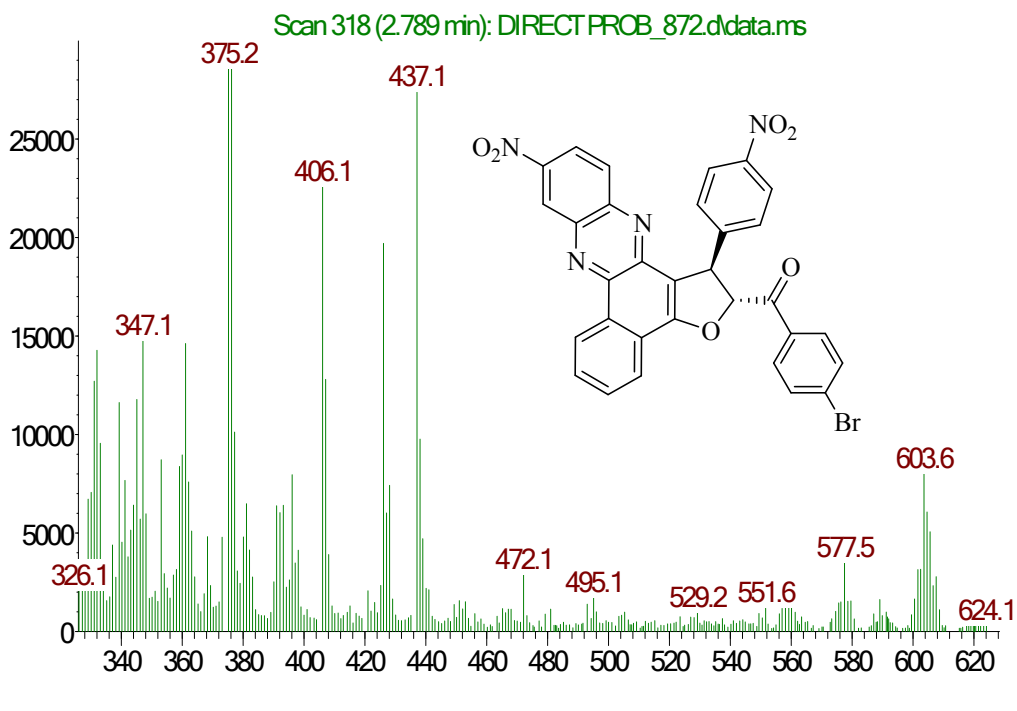

Figure 56: Mass spectrum of compound 60.

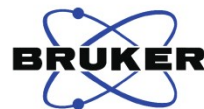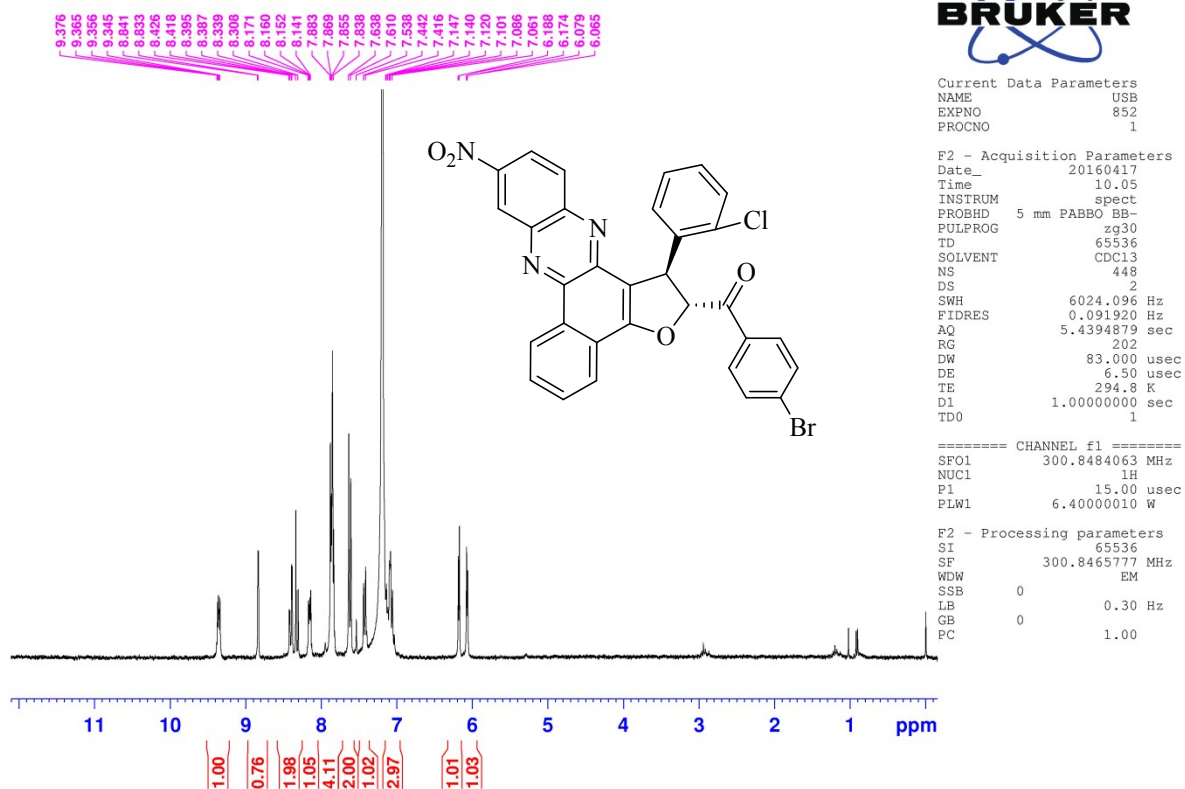

Figure 57: <sup>1</sup>H NMR spectrum of compound 6p (300 MHz, CDCl<sub>3</sub>).

13C-Dr.maghsodlou- code 370 (yazdani) -

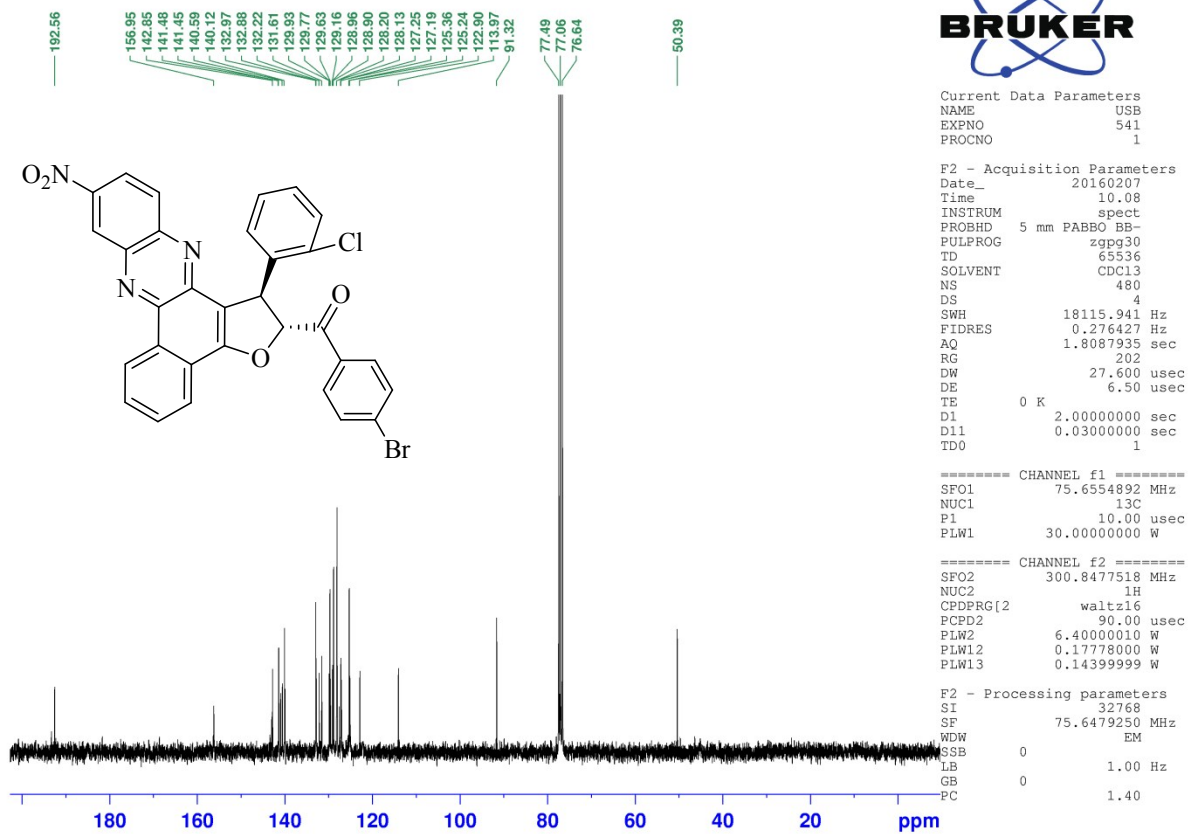

Figure 58:  $^{13}\text{C}$  NMR spectrum of compound **6p** (75 MHz,  $\text{CDCl}_3$ ).

Abundance

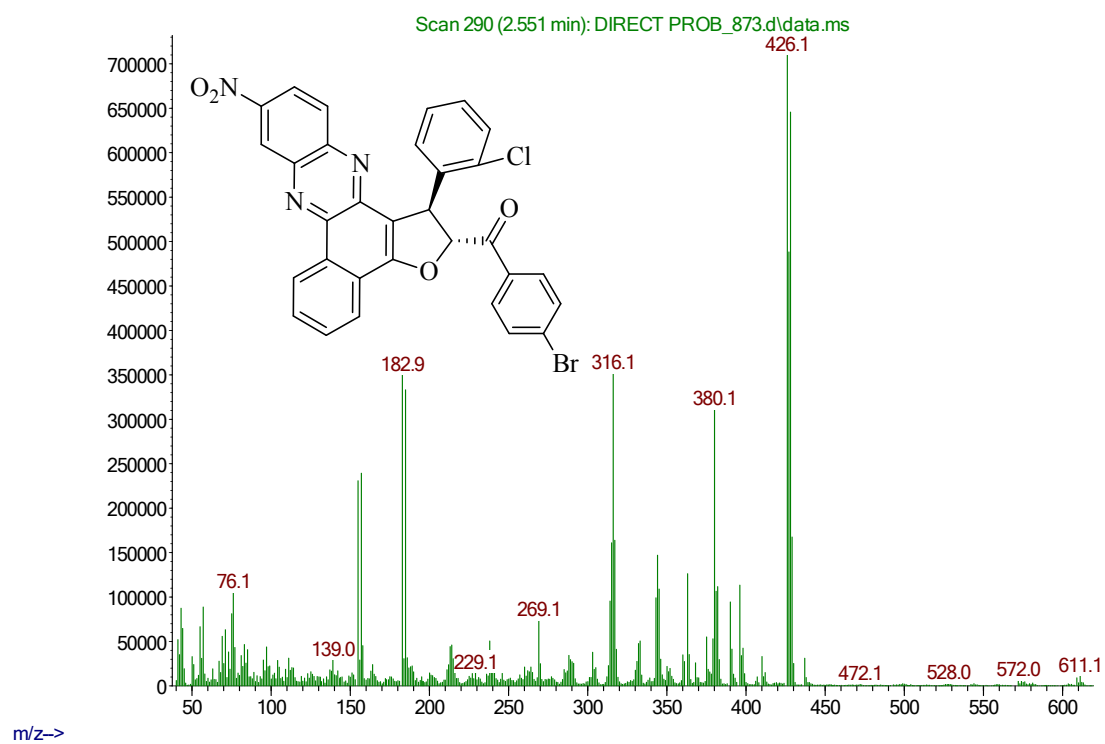

**Figure 59:** Mass spectrum of compound **6p**.
